# Supplementary material
Source: PubMed Central journal article supplement (PMC4852303)
Supplement: NIHMS780674-supplement-supplemental_tables.pdf [file NIHMS780674-supplement-supplemental_tables.pdf]

**Appendix: Full tables of LASA pairs studied, ranked by potential harm**

**Appendix Table 1: 608 Published LASA pairs, Ranked by Potential Harm of Receiving Delivered Drug in Error as Assessed by Delphi Panel Participants.**

| Generic Name of Delivered Drug | Published Name of Delivered Drug* | Published Name of Intended Drug† | Generic Name of Intended Drug         | Average Harm Score‡ | Number of Subjects§ |
|--------------------------------|-----------------------------------|----------------------------------|---------------------------------------|---------------------|---------------------|
| Potassium                      | <i>K Dur</i>                      | <i>Kayexalate</i>                | Sodium Polystyrene Sulfonate          | 93                  | 0                   |
| Cyclosporine                   | <b>Cyclosporine</b>               | <b>Cyclophosphamide</b>          | Cyclophosphamide                      | 92                  | 5                   |
| Digoxin                        | <i>Lanoxin</i>                    | Levothyroxine                    | Levothyroxine                         | 92                  | 15                  |
| Warfarin                       | <i>Coumadin</i>                   | <i>Cardura</i>                   | Doxazosin                             | 91                  | 5                   |
| Warfarin                       | <i>Jantoven</i>                   | <i>Januvia</i>                   | Sitagliptin                           | 90                  | 1                   |
| Warfarin                       | Warfarin                          | <i>Levaquin</i>                  | Levofloxacin                          | 90                  | 52                  |
| Warfarin                       | <i>Coumadin</i>                   | <i>Mephyton</i>                  | Phytonadione                          | 89                  | 5                   |
| Warfarin                       | <i>Coumadin</i>                   | <i>Avandia</i>                   | Rosiglitazone                         | 88                  | 2                   |
| Warfarin                       | <i>Jantoven</i>                   | <i>Janumet</i>                   | Sitagliptin + Metformin               | 88                  | 0                   |
| Azathioprine                   | Azathioprine                      | Azithromycin                     | Azithromycin                          | 87                  | 63                  |
| Temozolomide                   | <b><i>Temodar</i></b>             | <b><i>Tambocor</i></b>           | Flecainide                            | 86                  | 0                   |
| Cyclophosphamide               | <b>Cyclophosphamide</b>           | <b>Cyclosporine</b>              | Cyclosporine                          | 85                  | 5                   |
| Disopyramide                   | Disopyramide                      | Desipramine                      | Desipramine                           | 85                  | 0                   |
| Lithium                        | <b><i>Eskalith</i></b>            | <b><i>Effexor</i></b>            | Venlafaxine                           | 85                  | 99                  |
| Letrozole                      | <i>Femara</i>                     | <i>Famvir</i>                    | Famciclovir                           | 85                  | 0                   |
| Labetalol                      | Labetalol                         | Albuterol                        | Albuterol                             | 85                  | 40                  |
| Lithium                        | Lithium                           | Lanthanum                        | Lanthanum                             | 85                  | 0                   |
| Amiodarone                     | Amiodarone                        | Amlodipine                       | Amlodipine                            | 84                  | 3                   |
| Glipizide                      | <i>Glucotrol</i>                  | <i>Detrol</i>                    | Tolterodine                           | 84                  | 1                   |
| Nitroglycerin                  | <i>Nitro Bid</i>                  | <i>Macrobid</i>                  | Nitrofurantoin                        | 84                  | 5                   |
| Flecainide                     | <i>Tambocor</i>                   | Tamoxifen                        | Tamoxifen                             | 84                  | 0                   |
| Alprazolam                     | <i>Xanax</i>                      | <i>Atarax</i>                    | Hydroxyzine                           | 84                  | 430                 |
| Hydromorphone                  | Hydromorphone                     | Haloperidol                      | Haloperidol                           | 83                  | 0                   |
| Levorphanol                    | Levorphanol                       | Levothyroxine                    | Levothyroxine                         | 83                  | 0                   |
| Capecitabine                   | <i>Xeloda</i>                     | <i>Xenical</i>                   | Orlistat                              | 83                  | 0                   |
| Anastrozole                    | <i>Arimidex</i>                   | <i>Aromasin</i>                  | Exemestane                            | 82                  | 0                   |
| Clomipramine                   | <b>Clomipramine</b>               | <b>Clozapine</b>                 | Clozapine                             | 82                  | 1                   |
| Clomipramine                   | Clomipramine                      | <i>Clomid</i>                    | Clomiphene                            | 82                  | 0                   |
| Cyclosporine                   | Cyclosporine                      | Cycloserine                      | Cycloserine                           | 82                  | 0                   |
| Diazoxide                      | Diazoxide                         | <i>Diamox</i>                    | Acetazolamide                         | 82                  | 0                   |
| Fludrocortisone                | <i>Florinef</i>                   | <i>Fioricet</i>                  | Butalbital + Acetaminophen + Caffeine | 82                  | 0                   |
| Methadone                      | Methadone                         | Methylphenidate                  | Methylphenidate                       | 82                  | 9                   |
| Morphine                       | Morphine                          | Magnesium Sulfate                | Magnesium Sulfate                     | 82                  | 0                   |

|                             |                        |                        |                             |    |      |
|-----------------------------|------------------------|------------------------|-----------------------------|----|------|
| Nifedipine                  | Nifedipine             | Nortriptyline          | Nortriptyline               | 82 | 1    |
| Digoxin                     | <i>Lanoxin</i>         | <i>Lotensin</i>        | Benazepril                  | 81 | 18   |
| Tamoxifen                   | <i>Nolvadex</i>        | <i>Flomax</i>          | Tamsulosin                  | 81 | 0    |
| Amlodipine                  | Amlodipine             | Amiodarone             | Amiodarone                  | 80 | 3    |
| Metoprolol                  | <i>Lopressor</i>       | <i>Lyrica</i>          | Pregabalin                  | 80 | 5    |
| Amiodarone                  | <i>Pacerone</i>        | <i>Pancrease</i>       | Pancrelipase                | 80 | 3    |
| Midodrine                   | <i>Proamatine</i>      | Bromocriptine          | Bromocriptine               | 80 | 0    |
| Tacrolimus                  | Tacrolimus             | Tamsulosin             | Tamsulosin                  | 80 | 0    |
| Digoxin                     | <i>Lanoxin</i>         | <i>Lasix</i>           | Furosemide                  | 79 | 447  |
| Chlorambucil                | <b><i>Leukeran</i></b> | <b>Leucovorin</b>      | Leucovorin                  | 79 | 0    |
| Hydrocodone + Acetaminophen | <i>Lortab</i>          | Loratadine             | Loratadine                  | 79 | 8259 |
| Loxapine                    | <i>Loxitane</i>        | <i>Soriatane</i>       | Acitretin                   | 79 | 0    |
| Methotrexate                | Methotrexate           | Minoxidil              | Minoxidil                   | 79 | 0    |
| Procainamide                | <i>Procanbid</i>       | Probenecid             | Probenecid                  | 79 | 0    |
| Reserpine                   | Reserpine              | Ropinirole             | Ropinirole                  | 79 | 0    |
| Rosiglitazone + Metformin   | <i>Avandamet</i>       | <i>Anzemet</i>         | Dolasetron                  | 78 | 0    |
| Chlorpromazine              | Chlorpromazine         | Clomipramine           | Clomipramine                | 78 | 2    |
| Clozapine                   | <i>Clozaril</i>        | <i>Pletal</i>          | Cilostazol                  | 78 | 0    |
| Digoxin                     | <i>Lanoxin</i>         | <i>Levsin</i>          | Hyoscyamine                 | 78 | 24   |
| Methadone                   | Methadone              | <i>Mephyton</i>        | Phytonadione                | 78 | 1    |
| Methimazole                 | Methimazole            | Metaxalone             | Metaxalone                  | 78 | 6    |
| Nitroglycerin               | Nitroglycerin          | Nitrofurantoin         | Nitrofurantoin              | 78 | 5    |
| Sitagliptin + Metformin     | <b><i>Janumet</i></b>  | <b><i>Jantoven</i></b> | Warfarin                    | 77 | 0    |
| Theophylline                | <i>Slow Bid</i>        | <i>Slow K</i>          | Potassium                   | 77 | 0    |
| Hydrocodone + Acetaminophen | <i>Vicodin</i>         | <i>Vytorin</i>         | Ezetimibe + Simvastatin     | 77 | 20   |
| Digoxin                     | <i>Lanoxin</i>         | <i>Lomotil</i>         | Diphenoxylate + Atropine    | 76 | 7    |
| Digoxin                     | <i>Lanoxin</i>         | <i>Levaquin</i>        | Levofloxacin                | 76 | 24   |
| Levothyroxine               | <b>Levothyroxine</b>   | <b>Lamotrigine</b>     | Lamotrigine                 | 76 | 58   |
| Methadone                   | Methadone              | <i>Methylin</i>        | Methylphenidate             | 76 | 9    |
| Nadolol                     | Nadolol                | Haloperidol            | Haloperidol                 | 76 | 0    |
| Clopidogrel                 | <i>Plavix</i>          | <i>Mavik</i>           | Trandolapril                | 76 | 0    |
| Aminophylline               | Aminophylline          | Ampicillin             | Ampicillin                  | 75 | 0    |
| Olmesartan                  | <i>Benicar</i>         | <i>Benadryl</i>        | Diphenhydramine             | 75 | 3    |
| Carvedilol                  | <i>Coreg</i>           | <i>Cortone</i>         | Cortisone                   | 75 | 0    |
| Warfarin                    | <i>Coumadin</i>        | Phytonadione           | Phytonadione                | 75 | 5    |
| Meperidine                  | <i>Demerol</i>         | <i>Demadex</i>         | Torseamide                  | 75 | 1    |
| Methotrexate                | Methotrexate           | Metolazone             | Metolazone                  | 75 | 0    |
| Amlodipine                  | <i>Norvasc</i>         | <i>Zyrtec</i>          | Cetirizine                  | 75 | 233  |
| Mercaptopurine              | <i>Purinethol</i>      | Propylthiouracil       | Propylthiouracil            | 75 | 1    |
| Methimazole                 | <i>Tapazole</i>        | Trazodone              | Trazodone                   | 75 | 6    |
| Carbamazepine               | <i>Tegretol</i>        | <i>Toprol</i>          | Metoprolol                  | 75 | 11   |
| Diazepam                    | <i>Valium</i>          | <i>Vicodin</i>         | Hydrocodone + Acetaminophen | 75 | 3330 |

|                                     |                    |                       |                             |    |     |
|-------------------------------------|--------------------|-----------------------|-----------------------------|----|-----|
| Benzotropine                        | Benzotropine       | Benzonatate           | Benzonatate                 | 74 | 19  |
| Amitriptyline                       | <i>Elavil</i>      | <i>Clinoril</i>       | Sulindac                    | 74 | 14  |
| Sitagliptin                         | <i>Januvia</i>     | <i>Jantoven</i>       | Warfarin                    | 74 | 1   |
| Risperidone                         | Risperidone        | Risedronate           | Risedronate                 | 74 | 0   |
| Methocarbamol                       | <i>Robaxin</i>     | Ribavirin             | Ribavirin                   | 74 | 0   |
| Atenolol                            | <i>Tenormin</i>    | Tretinoin             | Tretinoin                   | 74 | 0   |
| Rosiglitazone                       | <i>Avandia</i>     | <i>Coumadin</i>       | Warfarin                    | 73 | 2   |
| Verapamil                           | <i>Calan</i>       | <i>Colace</i>         | Docusate                    | 73 | 0   |
| Clonazepam                          | Clonazepam         | Clonidine             | Clonidine                   | 73 | 569 |
| Hydromorphone                       | <i>Dilaudid</i>    | <i>Dilantin</i>       | Phenytoin                   | 73 | 3   |
| Hydroxyurea                         | Hydroxyurea        | Hydroxychloroquine    | Hydroxychloroquine          | 73 | 0   |
| Morphine                            | <i>Kadian</i>      | <i>Kapidex</i>        | Dexlansoprazole             | 73 | 0   |
| Sodium Polystyrene Sulfonate        | <i>Kayexalate</i>  | <i>Carafate</i>       | Sucralfate                  | 73 | 0   |
| Glyburide                           | <i>Micronase</i>   | <i>Microzide</i>      | Hydrochlorothiazide         | 73 | 12  |
| Pyridostigmine                      | Pyridostigmine     | Pyridoxine            | Pyridoxine                  | 73 | 0   |
| Imipramine                          | <i>Tofranil</i>    | <i>Toradol</i>        | Ketorolac                   | 73 | 14  |
| Benzotropine                        | Benzotropine       | Benazepril            | Benazepril                  | 72 | 2   |
| Verapamil                           | <i>Isoptin</i>     | <i>Isordil</i>        | Isosorbide                  | 72 | 0   |
| Isradipine                          | Isradipine         | Indapamide            | Indapamide                  | 72 | 0   |
| Metyrosine                          | Metyrosine         | Metyrapone            | Metyrapone                  | 72 | 0   |
| Sorafenib                           | <i>Nexavar</i>     | <i>Nexium</i>         | Esomeprazole                | 72 | 0   |
| Risperidone                         | <i>Risperdal</i>   | Lisinopril            | Lisinopril                  | 72 | 31  |
| Topiramate                          | <i>Topamax</i>     | <i>Tofranil</i>       | Imipramine                  | 72 | 59  |
| Midazolam                           | <i>Versed</i>      | <i>Vistaril</i>       | Hydroxyzine                 | 72 | 42  |
| Bisoprolol                          | <i>Zebeta</i>      | <i>Zyprexa</i>        | Olanzapine                  | 72 | 0   |
| Rivastigmine                        | <i>Exelon</i>      | <i>Effexor</i>        | Venlafaxine                 | 71 | 0   |
| Lopinavir + Ritonavir               | <i>Kaletra</i>     | <i>Keppra</i>         | Levetiracetam               | 71 | 0   |
| Felodipine                          | <i>Plendil</i>     | <i>Plavix</i>         | Clopidogrel                 | 71 | 0   |
| Sevelamer                           | <i>Renagel</i>     | <i>Renal Caps</i>     | Vitamin B and C Combination | 71 | 1   |
| Fosinopril                          | Fosinopril         | <i>Fosamax</i>        | Alendronate Sodium          | 70 | 0   |
| Hydroxychloroquine                  | Hydroxychloroquine | Hydroxyurea           | Hydroxyurea                 | 70 | 0   |
| Procabazine                         | <i>Matulane</i>    | <i>Materna</i>        | Prenatal Multivitamin       | 70 | 0   |
| Methadone                           | Methadone          | <i>Metadate</i>       | Methylphenidate             | 70 | 9   |
| Methimazole                         | Methimazole        | Misoprostol           | Misoprostol                 | 70 | 0   |
| Nitroglycerin                       | Nitroglycerin      | <i>Neo-Synephrine</i> | Phenylephrine               | 70 | 0   |
| Reserpine                           | Reserpine          | <i>Risperdal</i>      | Risperidone                 | 70 | 1   |
| Bisoprolol                          | <i>Zebeta</i>      | <i>Zetia</i>          | Ezetimibe                   | 70 | 0   |
| Acetylsalicylic Acid + Dipyridamole | <i>Aggrenox</i>    | <i>Agenerase</i>      | Amprenavir                  | 69 | 0   |
| Anagrelide                          | Anagrelide         | Anastrozole           | Anastrozole                 | 69 | 0   |

|                                                  |                     |                   |                              |    |      |
|--------------------------------------------------|---------------------|-------------------|------------------------------|----|------|
| Acetazolamide                                    | <i>Diamox</i>       | <i>Demadex</i>    | Torsemide                    | 69 | 0    |
| Propranolol                                      | <i>Inderal</i>      | <i>Imdur</i>      | Isosorbide                   | 69 | 2    |
| Amlodipine + Benazepril                          | <i>Lotrel</i>       | <i>Lortab</i>     | Hydrocodone + Acetaminophen  | 69 | 86   |
| Potassium Citrate + Sodium Citrate + Citric Acid | <i>Polycitra</i>    | <i>Bicitra</i>    | Citric Acid + Sodium Citrate | 69 | 1    |
| Potassium Phosphate                              | Potassium Phosphate | Sodium Phosphate  | Sodium Phosphate             | 69 | 0    |
| Lisinopril                                       | <i>Zestril</i>      | <i>Isordil</i>    | Isosorbide                   | 69 | 1    |
| Perindopril                                      | <i>Aceon</i>        | <i>Trilafon</i>   | Perphenazine                 | 68 | 0    |
| Atropine                                         | Atropine            | <i>Apresoline</i> | Hydralazine                  | 68 | 0    |
| Chloral Hydrate                                  | Chloral Hydrate     | Chlorothiazide    | Chlorothiazide               | 68 | 3    |
| Clomipramine                                     | Clomipramine        | Chlorpromazine    | Chlorpromazine               | 68 | 2    |
| Betaxolol                                        | <i>Kerlone</i>      | Ketorolac         | Ketorolac                    | 68 | 0    |
| Lamotrigine                                      | Lamotrigine         | Lamivudine        | Lamivudine                   | 68 | 1    |
| Methylergonovine                                 | Methylergonovine    | Methysergide      | Methysergide                 | 68 | 0    |
| Metolazone                                       | Metolazone          | Methotrexate      | Methotrexate                 | 68 | 0    |
| Amlodipine                                       | <i>Norvasc</i>      | <i>Nexium</i>     | Esomeprazole                 | 68 | 69   |
| Potassium Chloride                               | Potassium Chloride  | Sodium Chloride   | Sodium Chloride              | 68 | 57   |
| Prazosin                                         | Prazosin            | Prednisone        | Prednisone                   | 68 | 4    |
| Propylthiouracil                                 | Propylthiouracil    | <i>Purinethol</i> | Mercaptopurine               | 68 | 1    |
| Quinidine                                        | Quinidine           | Quinine           | Quinine                      | 68 | 0    |
| Selegiline                                       | Selegiline          | <i>Salagen</i>    | Pilocarpine                  | 68 | 0    |
| Tramadol                                         | Tramadol            | Trazodone         | Trazodone                    | 68 | 376  |
| Amitriptyline                                    | Amitriptyline       | Aminophylline     | Aminophylline                | 67 | 0    |
| Trihexyphenidyl                                  | <i>Artane</i>       | <i>Navane</i>     | Thiothixene                  | 67 | 0    |
| Irbesartan                                       | <i>Avapro</i>       | <i>Avelox</i>     | Moxifloxacin                 | 67 | 1    |
| Rasagiline                                       | <i>Azilect</i>      | <i>Aricept</i>    | Donepezil                    | 67 | 0    |
| Clozapine                                        | Clozapine           | Clofazimine       | Clofazimine                  | 67 | 0    |
| Digoxin                                          | <i>Lanoxin</i>      | <i>Levoxy</i>     | Levothyroxine                | 67 | 15   |
| Nicotine                                         | Nicotine            | Nitroglycerin     | Nitroglycerin                | 67 | 0    |
| Prazosin                                         | Prazosin            | <i>Prosom</i>     | Estazolam                    | 67 | 0    |
| Pyridostigmine                                   | <i>Regonol</i>      | <i>Reglan</i>     | Metoclopramide               | 67 | 4    |
| Ropinirole                                       | Ropinirole          | Reserpine         | Reserpine                    | 67 | 0    |
| Sotalol                                          | Sotalol             | <i>Sudafed</i>    | Pseudoephedrine              | 67 | 1    |
| Metoprolol                                       | <i>Toprol</i>       | Topiramate        | Topiramate                   | 67 | 38   |
| Hydrochlorothiazide + Bisoprolol                 | <i>Ziac</i>         | <i>Zyrtec</i>     | Cetirizine                   | 67 | 16   |
| Bicalutamide                                     | <i>Casodex</i>      | <i>Kapidex</i>    | Dexlansoprazole              | 66 | 0    |
| Clonidine                                        | Clonidine           | Cetirizine        | Cetirizine                   | 66 | 4222 |
| Felodipine                                       | Felodipine          | <i>Feldene</i>    | Piroxicam                    | 66 | 0    |
| Haloperidol                                      | <i>Haldol</i>       | <i>Halcion</i>    | Triazolam                    | 66 | 0    |
| Azathioprine                                     | <i>Imuran</i>       | <i>Tenormin</i>   | Atenolol                     | 66 | 6    |
| Isosorbide                                       | Isosorbide          | Isotretinoin      | Isotretinoin                 | 66 | 0    |

|                             |                     |                  |                       |    |      |
|-----------------------------|---------------------|------------------|-----------------------|----|------|
| Isosorbide                  | Isosorbide          | Isoniazid        | Isoniazid             | 66 | 0    |
| Morphine                    | Morphine            | Meperidine       | Meperidine            | 66 | 22   |
| Nitroglycerin               | Nitroglycerin       | Nicotine         | Nicotine              | 66 | 0    |
| Amlodipine                  | <i>Norvasc</i>      | <i>Navane</i>    | Thiothixene           | 66 | 0    |
| Risperidone                 | <i>Risperdal</i>    | <i>Requip</i>    | Ropinirole            | 66 | 16   |
| Selegiline                  | <i>Zelapar</i>      | <i>Zyprexa</i>   | Olanzapine            | 66 | 0    |
| Allopurinol                 | <i>Zyloprim</i>     | <i>Zovirax</i>   | Acyclovir             | 66 | 6    |
| Dipyridamole                | Dipyridamole        | Diphenhydramine  | Diphenhydramine       | 65 | 1    |
| Amitriptyline               | <i>Elavil</i>       | Enalapril        | Enalapril             | 65 | 24   |
| Hydrochlorothiazide         | Hydrochlorothiazide | Hydralazine      | Hydralazine           | 65 | 16   |
| Azathioprine                | <i>Imuran</i>       | <i>Imdur</i>     | Isosorbide            | 65 | 0    |
| Labetalol                   | Labetalol           | <i>Lipitor</i>   | Atorvastatin          | 65 | 6    |
| Lorazepam                   | Lorazepam           | Loratadine       | Loratadine            | 65 | 523  |
| Fentanyl                    | <i>Actiq</i>        | <i>Actigall</i>  | Ursodiol              | 64 | 2    |
| Morphine                    | <i>Avinza</i>       | <i>Evista</i>    | Raloxifene            | 64 | 1    |
| Diazepam                    | Diazepam            | Doxepin          | Doxepin               | 64 | 22   |
| Warfarin                    | <i>Jantoven</i>     | <i>Orvaten</i>   | Midodrine             | 64 | 1    |
| Lithium                     | Lithium             | Chlordiazepoxide | Chlordiazepoxide      | 64 | 38   |
| Hydrocodone + Acetaminophen | <i>Lortab</i>       | <i>Lipitor</i>   | Atorvastatin          | 64 | 189  |
| Olanzapine                  | Olanzapine          | Clonazepam       | Clonazepam            | 64 | 254  |
| Pindolol                    | Pindolol            | <i>Parlodol</i>  | Bromocriptine         | 64 | 0    |
| Repaglinide                 | <i>Prandin</i>      | <i>Oxandrin</i>  | Oxandrolone           | 64 | 0    |
| Lisinopril                  | <i>Prinivil</i>     | <i>Pepcid</i>    | Famotidine            | 64 | 50   |
| Nifedipine                  | <i>Procardia</i>    | <i>Prevacid</i>  | Lansoprazole          | 64 | 34   |
| Quetiapine                  | <i>Seroquel</i>     | <i>Provigil</i>  | Modafinil             | 64 | 27   |
| Topiramate                  | <i>Topamax</i>      | <i>Sporanox</i>  | Itraconazole          | 64 | 6    |
| Amiodarone                  | Amiodarone          | Amantadine       | Amantadine            | 63 | 0    |
| Amlodipine                  | Amlodipine          | Amiloride        | Amiloride             | 63 | 8    |
| Hydrochlorothiazide         | Hydrochlorothiazide | Hydrocortisone   | Hydrocortisone        | 63 | 80   |
| Nevirapine                  | Nevirapine          | Nefazodone       | Nefazodone            | 63 | 0    |
| Perphenazine                | Perphenazine        | Promethazine     | Promethazine          | 63 | 7    |
| Nifedipine                  | <i>Procardia</i>    | <i>Provera</i>   | Medroxyprogesterone   | 63 | 43   |
| Risperidone                 | <i>Risperdal</i>    | Reserpine        | Reserpine             | 63 | 1    |
| Rosiglitazone               | Rosiglitazone       | Risperidone      | Risperidone           | 63 | 0    |
| Carbamazepine               | <i>Tegretol</i>     | <i>Topamax</i>   | Topiramate            | 63 | 301  |
| Pentoxifylline              | <i>Trental</i>      | <i>Tegretol</i>  | Carbamazepine         | 63 | 2    |
| Selegiline                  | <i>Zelapar</i>      | <i>Zemplar</i>   | Paricalcitol          | 63 | 0    |
| Fluticasone + Salmeterol    | <i>Advair</i>       | <i>Atrovent</i>  | Ipratropium           | 62 | 869  |
| Clonidine+Chlorzhalidone    | <i>Combipres</i>    | <i>Combivent</i> | Albuterol+Ipratropium | 62 | 3198 |
| Isotretinoin                | Isotretinoin        | Isosorbide       | Isosorbide            | 62 | 0    |
| Labetalol                   | Labetalol           | <i>Carbatrol</i> | Carbamazepine         | 62 | 4    |

|                    |                    |                     |                       |    |     |
|--------------------|--------------------|---------------------|-----------------------|----|-----|
| Chlorambucil       | <i>Leukeran</i>    | Leucovorin          | Leucovorin            | 62 | 0   |
| Methadone          | Methadone          | Ketorolac           | Ketorolac             | 62 | 3   |
| Mifepristone       | Mifepristone       | Misoprostol         | Misoprostol           | 62 | 0   |
| Selegiline         | Selegiline         | Felodipine          | Felodipine            | 62 | 0   |
| Lorazepam          | <i>Ativan</i>      | Alprazolam          | Alprazolam            | 61 | 255 |
| Terbutaline        | <i>Brethine</i>    | Thiethylperazine    | Thiethylperazine      | 61 | 0   |
| Clozapine          | Clozapine          | Clonazepam          | Clonazepam            | 61 | 4   |
| Minoxidil          | <i>Loniten</i>     | <i>Lipitor</i>      | Atorvastatin          | 61 | 3   |
| Prazosin           | <i>Minipress</i>   | Minoxidil           | Minoxidil             | 61 | 0   |
| Phenoxybenzamine   | Phenoxybenzamine   | Phenazopyridine     | Phenazopyridine       | 61 | 0   |
| Risperidone        | Risperidone        | Reserpine           | Reserpine             | 61 | 0   |
| Stavudine          | <i>Zerit</i>       | <i>Zyrtec</i>       | Cetirizine            | 61 | 23  |
| Olanzapine         | <i>Zyprexa</i>     | <i>Zyrtec</i>       | Cetirizine            | 61 | 547 |
| Atenolol           | Atenolol           | Albuterol           | Albuterol             | 60 | 196 |
| Rosiglitazone      | <i>Avandia</i>     | <i>Evista</i>       | Raloxifene            | 60 | 0   |
| Chlorpromazine     | Chlorpromazine     | Chlorpropamide      | Chlorpropamide        | 60 | 0   |
| Clonazepam         | Clonazepam         | Lorazepam           | Lorazepam             | 60 | 486 |
| Torsemide          | <i>Demadex</i>     | <i>Demerol</i>      | Meperidine            | 60 | 1   |
| Dexmethylphenidate | Dexmethylphenidate | Methadone           | Methadone             | 60 | 0   |
| Indapamide         | Indapamide         | Isosorbide          | Isosorbide            | 60 | 0   |
| Levetiracetam      | <i>Keppra</i>      | <i>Kaletra</i>      | Lopinavir + Ritonavir | 60 | 0   |
| Methimazole        | Methimazole        | Memantine           | Memantine             | 60 | 0   |
| Methylprednisolone | Methylprednisolone | Methylegonovine     | Methylegonovine       | 60 | 37  |
| Methylprednisolone | Methylprednisolone | Medroxyprogesterone | Medroxyprogesterone   | 60 | 191 |
| Minoxidil          | Minoxidil          | <i>Minipress</i>    | Prazosin              | 60 | 0   |
| Minoxidil          | Minoxidil          | Midodrine           | Midodrine             | 60 | 0   |
| Fosinopril         | <i>Monopril</i>    | <i>Monurol</i>      | Fosfomycin            | 60 | 0   |
| Propranolol        | Propranolol        | Pantoprazole        | Pantoprazole          | 60 | 21  |
| Albuterol          | Albuterol          | Atenolol            | Atenolol              | 59 | 196 |
| Ramipril           | <i>Altace</i>      | <i>Artane</i>       | Trihexyphenidyl       | 59 | 0   |
| Nicardipine        | <i>Cardene</i>     | <i>Cordarone</i>    | Amiodarone            | 59 | 0   |
| Methotrexate       | <i>Folex</i>       | <i>Foltx</i>        | Vitamin B Combination | 59 | 1   |
| Alendronate Sodium | <i>Fosamax</i>     | <i>Zithromax</i>    | Azithromycin          | 59 | 61  |
| Lamivudine         | Lamivudine         | Lamotrigine         | Lamotrigine           | 59 | 1   |
| Methocarbamol      | Methocarbamol      | Metronidazole       | Metronidazole         | 59 | 135 |
| Phytonadione       | Phytonadione       | <i>Coumadin</i>     | Warfarin              | 59 | 5   |
| Salmeterol         | Salmeterol         | <i>Solu Medrol</i>  | Methylprednisolone    | 59 | 145 |
| Trazodone          | Trazodone          | <i>Trandate</i>     | Labetalol             | 59 | 3   |
| Doxazosin          | <i>Cardura</i>     | <i>Coumadin</i>     | Warfarin              | 58 | 5   |
| Hydrocortisone     | Hydrocortisone     | Hydralazine         | Hydralazine           | 58 | 3   |
| Eplerenone         | <i>Inspra</i>      | <i>Spiriva</i>      | Tiotropium            | 58 | 0   |

|                         |                    |                     |                     |    |     |
|-------------------------|--------------------|---------------------|---------------------|----|-----|
| Nitrofurantoin          | <i>Macrobid</i>    | <i>Nitro Bid</i>    | Nitroglycerin       | 58 | 5   |
| Cyclosporine            | <i>Neoral</i>      | <i>Inderal</i>      | Propranolol         | 58 | 9   |
| Gabapentin              | <i>Neurontin</i>   | Nitrofurantoin      | Nitrofurantoin      | 58 | 125 |
| Labetalol               | <i>Normodyne</i>   | <i>Norpramin</i>    | Desipramine         | 58 | 0   |
| Oxycodone               | <i>Oxycontin</i>   | <i>Oxandrin</i>     | Oxandrolone         | 58 | 9   |
| Paroxetine              | <i>Paxil</i>       | <i>Plavix</i>       | Clopidogrel         | 58 | 6   |
| Flecainide              | <i>Tambocor</i>    | <i>Temodar</i>      | Temozolomide        | 58 | 0   |
| Triamterene             | Triamterene        | Trimethoprim        | Trimethoprim        | 58 | 1   |
| Isotretinoin            | <i>Accutane</i>    | <i>Accupril</i>     | Quinapril           | 57 | 2   |
| Ramipril                | <i>Altace</i>      | <i>Actos</i>        | Pioglitazone        | 57 | 9   |
| Glimepiride             | <i>Amaryl</i>      | <i>Accupril</i>     | Quinapril           | 57 | 4   |
| Aminophylline           | Aminophylline      | Amitriptyline       | Amitriptyline       | 57 | 0   |
| Carbidopa               | Carbidopa          | Carvedilol          | Carvedilol          | 57 | 0   |
| Chlordiazepoxide        | Chlordiazepoxide   | Lithium             | Lithium             | 57 | 38  |
| Clofazimine             | Clofazimine        | Clozapine           | Clozapine           | 57 | 0   |
| Benazepril              | <i>Lotensin</i>    | Lovastatin          | Lovastatin          | 57 | 0   |
| Pyridostigmine          | <i>Mestinon</i>    | <i>Mexitil</i>      | Mexiletine          | 57 | 0   |
| Metaxalone              | Metaxalone         | Methimazole         | Methimazole         | 57 | 6   |
| Quinine                 | Quinine            | Quinidine           | Quinidine           | 57 | 0   |
| Galantamine             | <i>Reminyl</i>     | <i>Amaryl</i>       | Glimepiride         | 57 | 0   |
| Hydrocodone + Ibuprofen | <i>Reprexain</i>   | <i>Zyprexa</i>      | Olanzapine          | 57 | 16  |
| Rifaximin               | <i>Rifaximin</i>   | Rifampin            | Rifampin            | 57 | 0   |
| Guanfacine              | <i>Tenex</i>       | <i>Xanax</i>        | Alprazolam          | 57 | 45  |
| Tolterodine             | Tolterodine        | Ticlopidine         | Ticlopidine         | 57 | 0   |
| Clomipramine            | <i>Anafranil</i>   | Enalapril           | Enalapril           | 56 | 0   |
| Chlorpropamide          | Chlorpropamide     | Chlorpromazine      | Chlorpromazine      | 56 | 0   |
| Glyburide               | <i>Diabeta</i>     | Diazepam            | Diazepam            | 56 | 4   |
| Acetazolamide           | <i>Diamox</i>      | <i>Diabinese</i>    | Chlorpropamide      | 56 | 0   |
| Enalapril               | Enalapril          | <i>Anafranil</i>    | Clomipramine        | 56 | 0   |
| Felbamate               | <i>Felbatol</i>    | Labetalol           | Labetalol           | 56 | 0   |
| Hydroxychloroquine      | Hydroxychloroquine | Hydrochlorothiazide | Hydrochlorothiazide | 56 | 13  |
| Fosamprenavir           | <i>Lexiva</i>      | <i>Levitra</i>      | Vardenafil          | 56 | 0   |
| Trandolapril            | <i>Mavik</i>       | <i>Plavix</i>       | Clopidogrel         | 56 | 0   |
| Perphenazine            | Perphenazine       | <i>Periactin</i>    | Cyproheptadine      | 56 | 1   |
| Ropinirole              | Ropinirole         | Repaglinide         | Repaglinide         | 56 | 0   |
| Sitagliptin             | Sitagliptin        | Sumatriptan         | Sumatriptan         | 56 | 1   |
| Thiethylperazine        | Thiethylperazine   | <i>Brethine</i>     | Terbutaline         | 56 | 0   |
| Torsemide               | Torsemide          | Topiramate          | Topiramate          | 56 | 0   |
| Olanzapine              | <i>Zyprexa</i>     | <i>Zaroxolyn</i>    | Metolazone          | 56 | 1   |
| Exemestane              | <i>Aromasin</i>    | <i>Arimidex</i>     | Anastrozole         | 55 | 0   |
| Atenolol                | Atenolol           | Allopurinol         | Allopurinol         | 55 | 6   |
| Chlorpromazine          | Chlorpromazine     | Chlordiazepoxide    | Chlordiazepoxide    | 55 | 11  |
| Chlorthalidone          | Chlorthalidone     | Chlorpromazine      | Chlorpromazine      | 55 | 0   |
| Estrogen + Progesterone | <i>Femhrt</i>      | <i>Femara</i>       | Letrozole           | 55 | 0   |

|                                       |                   |                      |                     |    |     |
|---------------------------------------|-------------------|----------------------|---------------------|----|-----|
| Hydrocortisone                        | Hydrocortisone    | Hydrochlorothiazide  | Hydrochlorothiazide | 55 | 53  |
| Hydroxyurea                           | Hydroxyurea       | Hydrochlorothiazide  | Hydrochlorothiazide | 55 | 0   |
| Furosemide                            | <i>Lasix</i>      | <i>Lanoxin</i>       | Digoxin             | 55 | 447 |
| Baclofen                              | <i>Lioresal</i>   | <i>Lotensin</i>      | Benazepril          | 55 | 3   |
| Nefazodone                            | Nefazodone        | Nevirapine           | Nevirapine          | 55 | 0   |
| Amlodipine                            | <i>Norvasc</i>    | <i>Norvir</i>        | Ritonavir           | 55 | 1   |
| Phenytoin Sodium                      | Phenytoin Sodium  | Phytonadione         | Phytonadione        | 55 | 5   |
| Phenytoin Sodium                      | Phenytoin Sodium  | Nystatin             | Nystatin            | 55 | 72  |
| Probenecid                            | Probenecid        | Procainamide         | Procainamide        | 55 | 0   |
| Quetiapine                            | <i>Seroquel</i>   | <i>Ferro Sequels</i> | Iron                | 55 | 70  |
| Sodium Biphosphate + Sodium Phosphate | <i>Visicol</i>    | <i>Asacol</i>        | Mesalamine          | 55 | 6   |
| Ethosuximide                          | <i>Zarontin</i>   | <i>Neurontin</i>     | Gabapentin          | 55 | 11  |
| Aripiprazole                          | <i>Abilify</i>    | <i>Ambien</i>        | Zolpidem            | 54 | 165 |
| Acetaminophen                         | Acetaminophen     | Acetazolamide        | Acetazolamide       | 54 | 68  |
| Acetohexamide                         | Acetohexamide     | Acetazolamide        | Acetazolamide       | 54 | 0   |
| Alprazolam                            | Alprazolam        | Diazepam             | Diazepam            | 54 | 201 |
| Methadone                             | Methadone         | Dexamethasone        | Dexamethasone       | 54 | 8   |
| Midodrine                             | <i>Orvaten</i>    | <i>Jantoven</i>      | Warfarin            | 54 | 1   |
| Rifampin                              | <i>Rifadin</i>    | Rifabutin            | Rifabutin           | 54 | 0   |
| Methocarbamol                         | <i>Robaxin</i>    | <i>Relafen</i>       | Nabumetone          | 54 | 48  |
| Spironolactone                        | Spironolactone    | Sertraline           | Sertraline          | 54 | 10  |
| Tamoxifen                             | Tamoxifen         | <i>Tambocor</i>      | Flecainide          | 54 | 0   |
| Temazepam                             | Temazepam         | Triazolam            | Triazolam           | 54 | 1   |
| Doxycycline                           | <i>Vibramycin</i> | Vancomycin           | Vancomycin          | 54 | 0   |
| Chlorpromazine                        | Chlorpromazine    | Chlorthalidone       | Chlorthalidone      | 53 | 0   |
| Diazepam                              | Diazepam          | Diltiazem            | Diltiazem           | 53 | 6   |
| Loxapine                              | <i>Loxitane</i>   | <i>Lamictal</i>      | Lamotrigine         | 53 | 1   |
| Nitrofurantoin                        | Nitrofurantoin    | <i>Neurontin</i>     | Gabapentin          | 53 | 125 |
| Nortriptyline                         | Nortriptyline     | Nifedipine           | Nifedipine          | 53 | 1   |
| Olsalazine                            | Olsalazine        | Olanzapine           | Olanzapine          | 53 | 1   |
| Risperidone                           | <i>Risperdal</i>  | Bisoprolol           | Bisoprolol          | 53 | 5   |
| Aripiprazole                          | Aripiprazole      | Omeprazole           | Omeprazole          | 52 | 61  |
| Enalapril                             | Enalapril         | <i>Elavil</i>        | Amitriptyline       | 52 | 24  |
| Furosemide                            | Furosemide        | Loperamide           | Loperamide          | 52 | 9   |
| Imipramine                            | Imipramine        | <i>Imitrex</i>       | Sumatriptan         | 52 | 50  |
| Chlorzoxazone                         | <i>Parafon</i>    | <i>Profen</i>        | Ibuprofen           | 52 | 346 |
| Prednisone                            | Prednisone        | <i>Prilosec</i>      | Omeprazole          | 52 | 719 |
| Raloxifene                            | Raloxifene        | Rabeprazole          | Rabeprazole         | 52 | 0   |
| Doxepin                               | <i>Sinequan</i>   | <i>Seroquel</i>      | Quetiapine          | 52 | 58  |
| Tamsulosin                            | Tamsulosin        | Tacrolimus           | Tacrolimus          | 52 | 0   |
| Tenofovir                             | Tenofovir         | Trandolapril         | Trandolapril        | 52 | 0   |
| Vancomycin                            | Vancomycin        | <i>Vibramycin</i>    | Doxycycline         | 52 | 0   |



|                |                       |                   |                  |    |      |
|----------------|-----------------------|-------------------|------------------|----|------|
| Acyclovir      | Acyclovir             | <i>Retrovir</i>   | Zidovudine       | 51 | 2    |
| Hydralazine    | <i>Apresoline</i>     | Atropine          | Atropine         | 51 | 0    |
| Gabapentin     | Gabapentin            | Gemfibrozil       | Gemfibrozil      | 51 | 0    |
| Guanfacine     | Guanfacine            | Guaifenesin       | Guaifenesin      | 51 | 122  |
| Levothyroxine  | Levothyroxine         | Digoxin           | Digoxin          | 51 | 8    |
| Metoclopramide | Metoclopramide        | Metolazone        | Metolazone       | 51 | 8    |
| Molindone      | <i>Moban</i>          | <i>Mobic</i>      | Meloxicam        | 51 | 0    |
| Phenylephrine  | <i>Neo-Synephrine</i> | Nitroglycerin     | Nitroglycerin    | 51 | 0    |
| Ropinirole     | <i>Requip</i>         | <i>Reglan</i>     | Metoclopramide   | 51 | 5    |
| Acitretin      | <i>Soriatane</i>      | <i>Sonata</i>     | Zaleplon         | 51 | 0    |
| Imipramine     | <i>Tofranil</i>       | <i>Topamax</i>    | Topiramate       | 51 | 59   |
| Baclofen       | Baclofen              | Bethanechol       | Bethanechol      | 50 | 9    |
| Cycloserine    | Cycloserine           | Cyclosporine      | Cyclosporine     | 50 | 0    |
| Doxazosin      | Doxazosin             | Dexamethasone     | Dexamethasone    | 50 | 1    |
| Fosinopril     | Fosinopril            | Furosemide        | Furosemide       | 50 | 5    |
| Glipizide      | <i>Glucotrol</i>      | <i>Gabitril</i>   | Tiagabine        | 50 | 0    |
| Isosorbide     | <i>Isordil</i>        | <i>Zestril</i>    | Lisinopril       | 50 | 1    |
| Levothyroxine  | Levothyroxine         | <i>Levaquin</i>   | Levofloxacin     | 50 | 113  |
| Losartan       | Losartan              | Lisinopril        | Lisinopril       | 50 | 26   |
| Metaxalone     | Metaxalone            | Mesalamine        | Mesalamine       | 50 | 6    |
| Nateglinide    | Nateglinide           | Nadolol           | Nadolol          | 50 | 0    |
| Norfloracin    | <i>Noroxin</i>        | <i>Neurontin</i>  | Gabapentin       | 50 | 1    |
| Olanzapine     | Olanzapine            | Sertraline        | Sertraline       | 50 | 616  |
| Primaquine     | Primaquine            | Primidone         | Primidone        | 50 | 0    |
| Fluoxetine     | <i>Prozac</i>         | <i>Prograf</i>    | Tacrolimus       | 50 | 8    |
| Calcitriol     | <i>Rocaltrol</i>      | <i>Risperdal</i>  | Risperidone      | 50 | 9    |
| Triazolam      | Triazolam             | Trazodone         | Trazodone        | 50 | 4    |
| Olanzapine     | <i>Zyprexa</i>        | <i>Zebeta</i>     | Bisoprolol       | 50 | 0    |
| Trazodone      | <i>Desyrel</i>        | <i>Seroquel</i>   | Quetiapine       | 49 | 935  |
| Lorazepam      | Lorazepam             | Oxazepam          | Oxazepam         | 49 | 5    |
| Nortriptyline  | <i>Pamelor</i>        | <i>Tambacor</i>   | Flecainide       | 49 | 0    |
| Penicillamine  | Penicillamine         | Penicillin        | Penicillin       | 49 | 0    |
| Ticlopidine    | Ticlopidine           | <i>Tikosyn</i>    | Dofetilide       | 49 | 0    |
| Rosiglitazone  | <i>Avandia</i>        | <i>Amaryl</i>     | Glimepiride      | 48 | 4    |
| Clonazepam     | Clonazepam            | Olanzapine        | Olanzapine       | 48 | 254  |
| Phenytoin      | <i>Dilantin</i>       | Nystatin          | Nystatin         | 48 | 101  |
| Ethambutol     | Ethambutol            | <i>Ethmazine</i>  | Moricizine       | 48 | 0    |
| Fosinopril     | Fosinopril            | Fluoxetine        | Fluoxetine       | 48 | 2    |
| Leucovorin     | Leucovorin            | <i>Leukeran</i>   | Chlorambucil     | 48 | 0    |
| Minoxidil      | <i>Loniten</i>        | <i>Proamatine</i> | Midodrine        | 48 | 0    |
| Pyrazinamide   | Pyrazinamide          | Pyrimethamine     | Pyrimethamine    | 48 | 0    |
| Acitretin      | <i>Soriatane</i>      | <i>Loxitane</i>   | Loxapine         | 48 | 0    |
| Alprazolam     | <i>Xanax</i>          | <i>Xopenex</i>    | Levalbuterol     | 48 | 81   |
| Buspirone      | Buspirone             | Bupropion         | Bupropion        | 47 | 179  |
| Carbamazepine  | Carbamazepine         | Carisoprodol      | Carisoprodol     | 47 | 17   |
| Piroxicam      | <i>Feldene</i>        | Phenytoin Sodium  | Phenytoin Sodium | 47 | 3    |
| Hydrocortisone | Hydrocortisone        | Hydrocodone       | Hydrocodone      | 47 | 1490 |

|                                  |                   |                  |                                  |    |      |
|----------------------------------|-------------------|------------------|----------------------------------|----|------|
| Furosemide                       | <i>Lasix</i>      | <i>Luvox</i>     | Fluvoxamine                      | 47 | 1    |
| Levothyroxine                    | <i>Levoxy</i>     | <i>Lanoxin</i>   | Digoxin                          | 47 | 15   |
| Metoprolol                       | Metoprolol        | Mirtazapine      | Mirtazapine                      | 47 | 29   |
| Amlodipine                       | <i>Norvasc</i>    | <i>Nolvadex</i>  | Tamoxifen                        | 47 | 0    |
| Zileuton                         | <i>Zyflo</i>      | <i>Zyvox</i>     | Linezolid                        | 47 | 0    |
| Norethindrone                    | <i>Aygestin</i>   | <i>Aromasin</i>  | Exemestane                       | 46 | 0    |
| Dicyclomine                      | <i>Bentyl</i>     | <i>Benadryl</i>  | Diphenhydramine                  | 46 | 114  |
| Carisoprodol                     | Carisoprodol      | Carbamazepine    | Carbamazepine                    | 46 | 17   |
| Amitriptyline                    | <i>Elavil</i>     | <i>Epivir</i>    | Lamivudine                       | 46 | 1    |
| Lamivudine                       | <i>Epivir</i>     | <i>Elavil</i>    | Amitriptyline                    | 46 | 1    |
| Felodipine                       | Felodipine        | Selegiline       | Selegiline                       | 46 | 0    |
| Hydrocodone + Acetaminophen      | <i>Hydrogesic</i> | Hydroxyzine      | Hydroxyzine                      | 46 | 85   |
| Levothyroxine                    | Levothyroxine     | <i>Lanoxin</i>   | Digoxin                          | 46 | 15   |
| Megestrol                        | Megestrol         | Mesalamine       | Mesalamine                       | 46 | 1    |
| Thiothixene                      | <i>Navane</i>     | <i>Norvasc</i>   | Amlodipine                       | 46 | 0    |
| Conjugated Estrogens             | <i>Premarin</i>   | <i>Remeron</i>   | Mirtazapine                      | 46 | 17   |
| Sildenafil                       | <i>Revatio</i>    | <i>Revia</i>     | Naltrexone                       | 46 | 0    |
| Carbidopa + Levodopa             | <i>Sinemet</i>    | <i>Janumet</i>   | Sitagliptin + Metformin          | 46 | 0    |
| Butorphanol                      | <i>Stadol</i>     | <i>Haldol</i>    | Haloperidol                      | 46 | 0    |
| Terbutaline                      | Terbutaline       | Terazosin        | Terazosin                        | 46 | 0    |
| Allopurinol                      | Allopurinol       | Atenolol         | Atenolol                         | 45 | 6    |
| Propranolol                      | <i>Inderal</i>    | <i>Neoral</i>    | Cyclosporine                     | 45 | 9    |
| Chlordiazepoxide + Amitriptyline | <i>Limbitrol</i>  | <i>Librium</i>   | Chlordiazepoxide                 | 45 | 2    |
| Lisinopril                       | Lisinopril        | Verapamil        | Verapamil                        | 45 | 14   |
| Loperamide                       | Loperamide        | Lorazepam        | Lorazepam                        | 45 | 21   |
| Metformin                        | Metformin         | Methocarbamol    | Methocarbamol                    | 45 | 17   |
| Tramadol                         | Tramadol          | <i>Toprol</i>    | Metoprolol                       | 45 | 87   |
| Orlistat                         | <i>Xenical</i>    | <i>Xeloda</i>    | Capecitabine                     | 45 | 0    |
| Amantadine                       | Amantadine        | Amiodarone       | Amiodarone                       | 44 | 0    |
| Lorazepam                        | <i>Atrovent</i>   | <i>Flovent</i>   | Fluticasone                      | 44 | 1214 |
| Methocarbamol                    | <i>Librium</i>    | <i>Limbitrol</i> | Chlordiazepoxide + Amitriptyline | 44 | 2    |
| Prednisone                       | Prednisone        | <i>Prevacid</i>  | Lansoprazole                     | 44 | 2146 |
| Butorphanol                      | <i>Stadol</i>     | <i>Toradol</i>   | Ketorolac                        | 44 | 1    |
| Carbamazepine                    | <i>Tegretol</i>   | <i>Trileptal</i> | Oxcarbazepine                    | 44 | 259  |
| Temazepam                        | Temazepam         | Diazepam         | Diazepam                         | 44 | 62   |
| Cetirizine                       | <i>Zyrtec</i>     | <i>Zoloft</i>    | Sertraline                       | 44 | 2710 |
| Acetazolamide                    | Acetazolamide     | Acetylcysteine   | Acetylcysteine                   | 43 | 0    |
| Prednisone                       | <i>Deltasone</i>  | Trazodone        | Trazodone                        | 43 | 12   |
| Tamsulosin                       | <i>Flomax</i>     | <i>Nolvadex</i>  | Tamoxifen                        | 43 | 0    |
| Benazepril                       | <i>Lotensin</i>   | <i>Lanoxin</i>   | Digoxin                          | 43 | 18   |
| Mesalamine                       | <i>Pentasa</i>    | <i>Pancrease</i> | Pancrelipase                     | 43 | 5    |
| Zonisamide                       | Zonisamide        | Ziprasidone      | Ziprasidone                      | 43 | 10   |
| Candesartan                      | <i>Atacand</i>    | <i>Altace</i>    | Ramipril                         | 42 | 1    |

|                          |                     |                    |                             |    |      |
|--------------------------|---------------------|--------------------|-----------------------------|----|------|
| Isoniazid                | Isoniazid           | Isosorbide         | Isosorbide                  | 42 | 0    |
| Lisinopril               | Lisinopril          | <i>Restoril</i>    | Temazepam                   | 42 | 13   |
| Orphenadrine             | <i>Norflex</i>      | <i>Niferex</i>     | Iron                        | 42 | 3    |
| Medroxyprogesterone      | <i>Provera</i>      | <i>Procardia</i>   | Nifedipine                  | 42 | 43   |
| Lovastatin               | <i>Altacor</i>      | <i>Advair</i>      | Fluticasone + Salmeterol    | 41 | 2    |
| Terazosin                | <i>Hytrin</i>       | <i>Hydrea</i>      | Hydroxyurea                 | 41 | 0    |
| Terbinafine              | <i>Lamisil</i>      | <i>Lamictal</i>    | Lamotrigine                 | 41 | 26   |
| Memantine                | Memantine           | Mesalamine         | Mesalamine                  | 41 | 0    |
| Topiramate               | <i>Topamax</i>      | <i>Tapazole</i>    | Methimazole                 | 41 | 3    |
| Zonisamide               | <i>Zonegran</i>     | <i>Zomig</i>       | Zolmitriptan                | 41 | 3    |
| Desipramine              | Desipramine         | Disopyramide       | Disopyramide                | 40 | 0    |
| Galantamine              | Galantamine         | Glutamine          | Glutamine                   | 40 | 0    |
| Pancrelipase             | <i>Pancrease</i>    | <i>Pacerone</i>    | Amiodarone                  | 40 | 3    |
| Lansoprazole             | <i>Prevacid</i>     | <i>Procardia</i>   | Nifedipine                  | 40 | 34   |
| Doxepin                  | <i>Sinequan</i>     | <i>Zonegran</i>    | Zonisamide                  | 40 | 0    |
| Trihexyphenidyl          | Trihexyphenidyl     | Ramipril           | Ramipril                    | 40 | 0    |
| Buspirone                | Buspirone           | Risperidone        | Risperidone                 | 39 | 23   |
| Clomiphene               | Clomiphene          | Clomipramine       | Clomipramine                | 39 | 0    |
| Chlorothiazide           | <i>Diuril</i>       | <i>Diamox</i>      | Acetazolamide               | 39 | 2    |
| Indomethacin             | Indomethacin        | Indapamide         | Indapamide                  | 39 | 1    |
| Levothyroxine            | <i>Levoxyl</i>      | <i>Levaquin</i>    | Levofloxacin                | 39 | 113  |
| Lovastatin               | Lovastatin          | Lisinopril         | Lisinopril                  | 39 | 8    |
| Amiloride                | <i>Midamor</i>      | Midodrine          | Midodrine                   | 39 | 0    |
| Gabapentin               | <i>Neurontin</i>    | <i>Neoral</i>      | Cyclosporine                | 39 | 8    |
| Penicillin               | Penicillin          | Penicillamine      | Penicillamine               | 39 | 0    |
| Potassium Chloride       | Potassium Chloride  | Metronidazole      | Metronidazole               | 39 | 148  |
| Amoxicillin              | <i>Amoxil</i>       | <i>Diamox</i>      | Acetazolamide               | 38 | 107  |
| Hydroxyzine              | Hydroxyzine         | <i>Hydrogesic</i>  | Hydrocodone + Acetaminophen | 38 | 85   |
| Isosorbide               | <i>Imdur</i>        | <i>Imuran</i>      | Azathioprine                | 38 | 0    |
| Ketorolac                | Ketorolac           | <i>Kerlone</i>     | Betaxolol                   | 38 | 0    |
| Methadone                | Methadone           | Meperidine         | Meperidine                  | 38 | 4    |
| Trazodone                | Trazodone           | <i>Topamax</i>     | Topiramate                  | 38 | 330  |
| Vancomycin               | Vancomycin          | Valacyclovir       | Valacyclovir                | 38 | 1    |
| Olanzapine               | <i>Zyprexa</i>      | Ziprasidone        | Ziprasidone                 | 38 | 353  |
| Propranolol              | <i>Inderal</i>      | <i>Isordil</i>     | Isosorbide                  | 37 | 2    |
| Vardenafil               | <i>Levitra</i>      | <i>Lexiva</i>      | Fosamprenavir               | 37 | 0    |
| Medroxyprogesterone      | Medroxyprogesterone | Methylprednisolone | Methylprednisolone          | 37 | 191  |
| Pramipexole              | <i>Mirapex</i>      | <i>Mifeprex</i>    | Mifepristone                | 37 | 0    |
| Triamterene              | Triamterene         | Trientine          | Trientine                   | 37 | 0    |
| Mefloquine               | <i>Lariam</i>       | <i>Levaquin</i>    | Levofloxacin                | 36 | 1    |
| Diphenoxylate + Atropine | <i>Lomotil</i>      | <i>Lortab</i>      | Hydrocodone + Acetaminophen | 36 | 1326 |
| Metyrapone               | Metyrapone          | Metyrosine         | Metyrosine                  | 36 | 0    |
| Promethazine             | Promethazine        | Phenazopyridine    | Phenazopyridine             | 36 | 3344 |

|                                                                |                  |                  |                             |    |      |
|----------------------------------------------------------------|------------------|------------------|-----------------------------|----|------|
| Rifabutin                                                      | Rifabutin        | <i>Rifadin</i>   | Rifampin                    | 36 | 0    |
| Trazodone                                                      | Trazodone        | <i>Aldactone</i> | Spironolactone              | 36 | 4    |
| Alprazolam                                                     | <i>Xanax</i>     | <i>Tenex</i>     | Guanfacine                  | 36 | 45   |
| Stavudine                                                      | <i>Zerit</i>     | <i>Zestril</i>   | Lisinopril                  | 36 | 2    |
| Sertraline                                                     | <i>Zoloft</i>    | <i>Serevent</i>  | Salmeterol                  | 36 | 97   |
| Ibuprofen                                                      | <i>Advil</i>     | <i>Advair</i>    | Fluticasone + Salmeterol    | 35 | 3295 |
| Lorazepam                                                      | <i>Ativan</i>    | <i>Ambien</i>    | Zolpidem                    | 35 | 342  |
| Nadolol                                                        | <i>Corgard</i>   | <i>Cozaar</i>    | Losartan                    | 35 | 0    |
| Fluvoxamine                                                    | Fluvoxamine      | Flavoxate        | Flavoxate                   | 35 | 0    |
| Hydrochlorothiazide + Triamterene                              | <i>Maxzide</i>   | <i>Marinol</i>   | Dronabinol                  | 35 | 0    |
| Rifampin                                                       | <i>Rifadin</i>   | <i>Rifamate</i>  | Rifampin + Isoniazid        | 35 | 1    |
| Chlorpromazine                                                 | <i>Thorazine</i> | Thiamine         | Thiamine                    | 35 | 0    |
| Baclofen                                                       | Baclofen         | <i>Blocadren</i> | Timolol                     | 34 | 0    |
| Doxazosin                                                      | <i>Cardura</i>   | <i>Avandia</i>   | Rosiglitazone               | 34 | 1    |
| Dapsone                                                        | Dapsone          | Danazol          | Danazol                     | 34 | 0    |
| Esomeprazole                                                   | <i>Nexium</i>    | <i>Nexavar</i>   | Sorafenib                   | 34 | 0    |
| Metolazone                                                     | <i>Zaroxolyn</i> | Azithromycin     | Azithromycin                | 34 | 19   |
| Cyclobenzaprine                                                | Cyclobenzaprine  | Cetirizine       | Cetirizine                  | 33 | 2379 |
| Hydrochlorothiazide + Triamterene                              | <i>Maxzide</i>   | <i>Microzide</i> | Hydrochlorothiazide         | 33 | 0    |
| Nitrofurantoin                                                 | Nitrofurantoin   | Nitroglycerin    | Nitroglycerin               | 33 | 5    |
| Prednisolone                                                   | <i>Prelone</i>   | <i>Prozac</i>    | Fluoxetine                  | 33 | 347  |
| Estazolam                                                      | <i>Prosom</i>    | <i>Proscar</i>   | Finasteride                 | 33 | 0    |
| Tramadol                                                       | <i>Ultram</i>    | <i>Voltaren</i>  | Diclofenac                  | 33 | 747  |
| Danazol                                                        | Danazol          | <i>Dantrium</i>  | Dantrolene                  | 32 | 0    |
| Dicyclomine                                                    | Dicyclomine      | Diphenhydramine  | Diphenhydramine             | 32 | 114  |
| Valsartan                                                      | <i>Diovan</i>    | <i>Zyban</i>     | Bupropion                   | 32 | 6    |
| Isotretinoin                                                   | Isotretinoin     | Tretinoin        | Tretinoin                   | 32 | 0    |
| Lamotrigine                                                    | Lamotrigine      | Levetiracetam    | Levetiracetam               | 32 | 388  |
| Metolazone                                                     | Metolazone       | Methimazole      | Methimazole                 | 32 | 0    |
| Triamcinolone                                                  | <i>Nasacort</i>  | <i>Azmacort</i>  | Triamcinolone               | 32 | 87   |
| Prednisone                                                     | Prednisone       | Propranolol      | Propranolol                 | 32 | 303  |
| Sulindac                                                       | <i>Clinoril</i>  | Clindamycin      | Clindamycin                 | 31 | 25   |
| Levodopa                                                       | Levodopa         | Levofloxacin     | Levofloxacin                | 31 | 0    |
| Atorvastatin                                                   | <i>Lipitor</i>   | <i>Lortab</i>    | Hydrocodone + Acetaminophen | 31 | 189  |
| Modafinil                                                      | <i>Provigil</i>  | <i>Proventil</i> | Albuterol                   | 31 | 68   |
| Hyoscyamine + Methenamine + Methylene Blue + Phenyl salicylate | <i>Urised</i>    | <i>Urispas</i>   | Flavoxate                   | 31 | 4    |
| Mesalamine                                                     | <i>Asacol</i>    | <i>Visicol</i>   | Sodium Biphosphate +        | 30 | 6    |

|                                       |                             |                     |                                   |    |      |
|---------------------------------------|-----------------------------|---------------------|-----------------------------------|----|------|
|                                       |                             |                     | Sodium Phosphate                  |    |      |
| Raloxifene                            | <i>Evista</i>               | <i>Avandia</i>      | Rosiglitazone                     | 30 | 0    |
| Fluoxetine                            | Fluoxetine                  | Fosinopril          | Fosinopril                        | 30 | 2    |
| Sitagliptin + Metformin               | <i>Janumet</i>              | <i>Sinemet</i>      | Carbidopa + Levodopa              | 30 | 0    |
| Atorvastatin                          | <i>Lipitor</i>              | <i>Lopid</i>        | Gemfibrozil                       | 30 | 4    |
| Pravastatin                           | <i>Pravachol</i>            | <i>Prinivil</i>     | Lisinopril                        | 30 | 28   |
| Naltrexone                            | <i>Revia</i>                | <i>Revatio</i>      | Sildenafil                        | 30 | 0    |
| Simvastatin                           | Simvastatin                 | Valsartan           | Valsartan                         | 30 | 10   |
| Butalbital + Acetaminophen + Caffeine | <i>Fioricet</i>             | <i>Florinef</i>     | Fludrocortisone                   | 29 | 0    |
| Vardenafil                            | <i>Levitra</i>              | <i>Kaletra</i>      | Lopinavir + Ritonavir             | 29 | 0    |
| Polythiazide + Prazosin               | <i>Minizide</i>             | <i>Maxzide</i>      | Hydrochlorothiazide + Triamterene | 29 | 0    |
| Oxybutynin                            | Oxybutynin                  | <i>Oxycontin</i>    | Oxycodone                         | 29 | 149  |
| Sertraline                            | Sertraline                  | <i>Serentil</i>     | Mesoridazine                      | 29 | 3    |
| Acetaminophen                         | <i>Tylenol</i>              | <i>Tegretol</i>     | Carbamazepine                     | 29 | 510  |
| Ezetimibe + Simvastatin               | <i>Vytorin</i>              | <i>Vicodin</i>      | Hydrocodone + Acetaminophen       | 29 | 20   |
| Risedronate                           | <i>Actonel</i>              | Atenolol            | Atenolol                          | 28 | 1    |
| Nitrofurantoin                        | <i>Macrobid</i>             | <i>Micro K</i>      | Potassium                         | 28 | 76   |
| Sodium Phosphate                      | Sodium Phosphate            | Potassium Phosphate | Potassium Phosphate               | 28 | 0    |
| Urocit                                | <i>Urocit</i>               | Vitamin K           | Vitamin K                         | 28 | 0    |
| Cyclobenzaprine                       | Cyclobenzaprine             | Chlorpromazine      | Chlorpromazine                    | 27 | 5    |
| Danazol                               | <i>Danocrine</i>            | <i>Dantrium</i>     | Dantrolene                        | 27 | 0    |
| Rimantidine                           | <i>Flumadine</i>            | Amantadine          | Amantadine                        | 27 | 9    |
| Lorazepam                             | Lorazepam                   | Clonazepam          | Clonazepam                        | 27 | 486  |
| Metoclopramide                        | Metoclopramide              | Metronidazole       | Metronidazole                     | 27 | 1381 |
| Piroxicam                             | <i>Feldene</i>              | Paroxetine          | Paroxetine                        | 26 | 22   |
| Hmg Coa Reductase inhibitor           | Hmg Coa Reductase inhibitor | Nystatin            | Nystatin                          | 26 | 62   |
| Cephalexin                            | <i>Keflex</i>               | <i>Keppra</i>       | Levetiracetam                     | 26 | 419  |
| Hyoscyamine                           | <i>Levsin</i>               | <i>Lanoxin</i>      | Digoxin                           | 26 | 24   |
| Meloxicam                             | Meloxicam                   | Molindone           | Molindone                         | 26 | 0    |
| Sodium Chloride                       | Sodium Chloride             | Potassium Chloride  | Potassium Chloride                | 26 | 57   |
| Triamcinolone                         | <i>Azmacort</i>             | <i>Atrovent</i>     | Ipratropium                       | 25 | 40   |
| Gatifloxacin                          | Gatifloxacin                | Gabapentin          | Gabapentin                        | 25 | 14   |
| Phytonadione                          | <i>Mephyton</i>             | <i>Coumadin</i>     | Warfarin                          | 25 | 5    |
| Mirtazapine                           | Mirtazapine                 | Temazepam           | Temazepam                         | 25 | 78   |
| Erythromycin + Sulfasoxazole          | <i>Pediazole</i>            | <i>Pediapred</i>    | Prednisolone                      | 25 | 2101 |
| Trimethobenzamide                     | Trimethobenzamide           | Trimethoprim        | Trimethoprim                      | 25 | 0    |
| Carvedilol                            | <i>Coreg</i>                | <i>Cozaar</i>       | Losartan                          | 24 | 7    |

|                                   |                  |                     |                                 |    |      |
|-----------------------------------|------------------|---------------------|---------------------------------|----|------|
| Fluconazole                       | Fluconazole      | Metronidazole       | Metronidazole                   | 24 | 7133 |
| Dexlansoprazole                   | <i>Kapidex</i>   | <i>Casodex</i>      | Bicalutamide                    | 24 | 0    |
| Levofloxacin                      | <i>Levaquin</i>  | <i>Lanoxin</i>      | Digoxin                         | 24 | 24   |
| Meloxicam                         | <i>Mobic</i>     | <i>Moban</i>        | Molindone                       | 24 | 0    |
| Nefazodone                        | Nefazodone       | Nelfinavir          | Nelfinavir                      | 24 | 1    |
| Valacyclovir                      | <i>Valtrex</i>   | Divalproex          | Divalproex                      | 24 | 84   |
| Fluticasone                       | <i>Flovent</i>   | <i>Flomax</i>       | Tamsulosin                      | 23 | 7    |
| Folic Acid                        | Folic Acid       | Folinic Acid        | Folinic Acid                    | 23 | 8    |
| Sitagliptin                       | <i>Januvia</i>   | <i>Janumet</i>      | Sitagliptin + Metformin         | 23 | 0    |
| Levofloxacin                      | Levofloxacin     | Levodopa            | Levodopa                        | 23 | 0    |
| Fluvoxamine                       | <i>Luvox</i>     | <i>Lasix</i>        | Furosemide                      | 23 | 1    |
| Rabeprazole                       | Rabeprazole      | Donepezil           | Donepezil                       | 23 | 0    |
| Moxifloxacin                      | <i>Avelox</i>    | <i>Avandia</i>      | Rosiglitazone                   | 22 | 6    |
| Albuterol+Ipratropium             | <i>Combivent</i> | <i>Combivir</i>     | Lamivudine + Zidovudine         | 22 | 47   |
| Gemfibrozil                       | Gemfibrozil      | Gabapentin          | Gabapentin                      | 22 | 0    |
| Levetiracetam                     | Levetiracetam    | Lamotrigine         | Lamotrigine                     | 22 | 388  |
| Levofloxacin                      | Levofloxacin     | Levothyroxine       | Levothyroxine                   | 22 | 113  |
| Doxepin                           | <i>Sinequan</i>  | Saquinavir          | Saquinavir                      | 22 | 0    |
| Promethazine                      | <i>Phenergan</i> | Phenobarbital       | Phenobarbital                   | 21 | 310  |
| Sorbitol                          | Sorbitol         | <i>Sorbitrate</i>   | Isosorbide                      | 21 | 0    |
| Omeprazole + Sodium Bicarbonate   | <i>Zegerid</i>   | <i>Zestril</i>      | Lisinopril                      | 21 | 15   |
| Azithromycin                      | <i>Zithromax</i> | <i>Zolofl</i>       | Sertraline                      | 21 | 4784 |
| Doxycycline                       | Doxycycline      | Doxepin             | Doxepin                         | 20 | 65   |
| Lovastatin                        | Lovastatin       | Losartan            | Losartan                        | 20 | 1    |
| Sertraline                        | Sertraline       | <i>Serevent</i>     | Salmeterol                      | 20 | 97   |
| Tolterodine                       | Tolterodine      | Tacrolimus          | Tacrolimus                      | 20 | 2    |
| Valacyclovir                      | Valacyclovir     | Vancomycin          | Vancomycin                      | 20 | 1    |
| Phenylephrine + Pyrilamine        | <i>Viravan</i>   | <i>Vivarin</i>      | Caffeine                        | 20 | 0    |
| Cephalexin                        | Cephalexin       | Ciprofloxacin       | Ciprofloxacin                   | 19 | 3266 |
| Ciprofloxacin                     | <i>Cipro</i>     | <i>Ceftin</i>       | Cefuroxime                      | 19 | 275  |
| Hydrochlorothiazide + Triamterene | <i>Maxzide</i>   | Hydrochlorothiazide | Hydrochlorothiazide             | 19 | 0    |
| Pravastatin                       | <i>Pravachol</i> | <i>Paxil</i>        | Paroxetine                      | 19 | 11   |
| Acrivastine                       | <i>Semprex</i>   | <i>Sepra</i>        | Sulfamethoxazole + Trimethoprim | 19 | 44   |
| Clindamycin                       | <i>Cleocin</i>   | <i>Cipro</i>        | Ciprofloxacin                   | 18 | 402  |
| Famciclovir                       | <i>Famvir</i>    | <i>Femara</i>       | Letrozole                       | 18 | 0    |
| Fluticasone                       | <i>Flovent</i>   | <i>Atrovent</i>     | Ipratropium                     | 18 | 1214 |
| Phytonadione                      | <i>Mephyton</i>  | Methadone           | Methadone                       | 18 | 1    |
| Dextroamphetamine+Amphetamine     | <i>Adderall</i>  | <i>Inderal</i>      | Propranolol                     | 17 | 207  |
| Levofloxacin                      | <i>Levaquin</i>  | <i>Lariam</i>       | Mefloquine                      | 17 | 1    |
| Probenecid                        | Probenecid       | <i>Procanbid</i>    | Procainamide                    | 17 | 0    |

|                                                                 |                   |                     |                                                 |    |      |
|-----------------------------------------------------------------|-------------------|---------------------|-------------------------------------------------|----|------|
| Cefuroxime                                                      | <i>Zinacef</i>    | <i>Zithromax</i>    | Azithromycin                                    | 17 | 9099 |
| Simvastatin                                                     | <i>Zocor</i>      | <i>Zoloft</i>       | Sertraline                                      | 17 | 24   |
| Ipratropium                                                     | <i>Atrovent</i>   | <i>Advair</i>       | Fluticasone +<br>Salmeterol                     | 16 | 869  |
| Calcium                                                         | Calcium           | Calcitriol          | Calcitriol                                      | 16 | 66   |
| Sucralfate                                                      | <i>Carafate</i>   | <i>Kayexalate</i>   | Sodium<br>Polystyrene<br>Sulfonate              | 16 | 0    |
| Levocarnitine                                                   | Levocarnitine     | Levetiracetam       | Levetiracetam                                   | 16 | 123  |
| Omeprazole                                                      | Omeprazole        | Aripiprazole        | Aripiprazole                                    | 16 | 61   |
| Penicillin                                                      | Penicillin        | Penicillamine       | Penicillamine                                   | 16 | 0    |
| Vitamin B<br>Complex +<br>Vitamin C +<br>Biotin + Folic<br>Acid | <i>Nephrocaps</i> | <i>Neutra Phos</i>  | Potassium<br>phosphate +<br>Sodium<br>phosphate | 15 | 6    |
| Bisoprolol                                                      | <i>Zebeta</i>     | <i>Ziac</i>         | Hydrochlorothiaz<br>ide + Bisoprolol            | 15 | 128  |
| Ibuprofen                                                       | <i>Motrin</i>     | <i>Neurontin</i>    | Gabapentin                                      | 14 | 511  |
| Pantoprazole                                                    | <i>Protonix</i>   | <i>Topamax</i>      | Topiramate                                      | 14 | 48   |
| Methylphenidate                                                 | <i>Ritalin</i>    | Ritodrine           | Ritodrine                                       | 14 | 0    |
| Oxaprozin                                                       | Oxaprozin         | Oxcarbazepine       | Oxcarbazepine                                   | 13 | 11   |
| Omeprazole                                                      | <i>Prilosec</i>   | Prednisone          | Prednisone                                      | 13 | 719  |
| Simethicone                                                     | Simethicone       | Spironolactone      | Spironolactone                                  | 13 | 5    |
| Azithromycin                                                    | <i>Zithromax</i>  | <i>Zyvox</i>        | Linezolid                                       | 13 | 93   |
| Carbenicillin                                                   | <i>Geocillin</i>  | <i>Lamictal</i>     | Lamotrigine                                     | 12 | 1    |
| Guaifenesin                                                     | <i>Mucinex</i>    | <i>Mucomyst</i>     | N-Acetylcysteine                                | 12 | 0    |
| Azithromycin                                                    | <i>Zithromax</i>  | <i>Zinacef</i>      | Cefuroxime                                      | 12 | 9099 |
| Cetirizine                                                      | <i>Zyrtec</i>     | <i>Zerit</i>        | Stavudine                                       | 12 | 23   |
| Nystatin                                                        | Nystatin          | Nitroglycerin       | Nitroglycerin                                   | 11 | 6    |
| Nystatin                                                        | Nystatin          | Phenytoin<br>Sodium | Phenytoin<br>Sodium                             | 11 | 72   |
| Omega-3<br>Polyunsaturated<br>Fatty Acid                        | <i>Omacor</i>     | <i>Amicar</i>       | Aminocaproic<br>Acid                            | 10 | 0    |
| Phenazopyridine                                                 | <i>Pyridium</i>   | Pyridoxine          | Pyridoxine                                      | 10 | 0    |
| Rosiglitazone                                                   | <i>Avandia</i>    | <i>Avandamet</i>    | Rosiglitazone +<br>Metformin                    | 9  | 18   |
| Xylometazoline                                                  | <i>Natru Vent</i> | <i>Atrovent</i>     | Ipratropium                                     | 9  | 0    |
| Phytonadione                                                    | Phytonadione      | Phenytoin<br>Sodium | Phenytoin<br>Sodium                             | 9  | 5    |
| Trimethobenzam<br>ide                                           | <i>Tigan</i>      | <i>Ticlid</i>       | Ticlopidine                                     | 9  | 0    |
| Levofloxacin                                                    | <i>Levaquin</i>   | Warfarin            | Warfarin                                        | 8  | 52   |
| Azithromycin                                                    | Azithromycin      | Azathioprine        | Azathioprine                                    | 7  | 63   |
| Esomeprazole                                                    | <i>Nexium</i>     | <i>Norvasc</i>      | Amlodipine                                      | 7  | 69   |
| Pyridoxine                                                      | Pyridoxine        | Pyridostigmine      | Pyridostigmine                                  | 7  | 0    |
| Montelukast                                                     | <i>Singulair</i>  | <i>Sinequan</i>     | Doxepin                                         | 7  | 94   |
| Vitamin B<br>Combination                                        | <i>Foltx</i>      | <i>Folex</i>        | Methotrexate                                    | 6  | 1    |
| Bismuth                                                         | <i>Kaopectate</i> | <i>Kayexalate</i>   | Sodium                                          | 5  | 0    |

|                       |                 |                 |                       |   |   |
|-----------------------|-----------------|-----------------|-----------------------|---|---|
| Subsalicylate         |                 |                 | Polystyrene Sulfonate |   |   |
| Prenatal Multivitamin | <i>Materna</i>  | <i>Matulane</i> | Procarbazine          | 5 | 0 |
| Pyridoxine            | Pyridoxine      | Primidone       | Primidone             | 5 | 0 |
| Thiamine              | Thiamine        | <i>Thalomid</i> | Thalidomide           | 3 | 0 |
| Lactobacillus         | <i>Lactinex</i> | <i>Lamictal</i> | Lamotrigine           | 2 | 0 |

\* Delivered Drug: The drug patient received in error.

† Intended Drug: The drug patient was supposed to receive.

‡ Average Harm Score: Represents the average of Round 3 evaluations of the opinion-generated estimate of the harm that might occur from this substitution, where patient received the delivered drug instead of the intended drug.

§ Number of Subjects: Represents the number of subjects in the 2000-2009 data who received both drugs in the respective LASA pair within a six month period, regardless of whether this was intended or in error. Each occurrence represents a potential LASA substitution error.

**BOLD** typeface indicates that the LASA pair is in the highest decile for potential harm for receiving the delivered drug in error and the highest decile for potential harm of not receiving the intended drug.

*Italic* typeface indicates brand names.



**Appendix Table 2: 608 Published LASA pairs, Ranked by Potential Harm of NOT Receiving the Intended Drug as Assessed by Delphi Panel Participants.**

| Generic Name of Intended Drug | Published Name of Intended Drug* | Published Name of Delivered Drug† | Generic Name of Delivered Drug | Average Harm Score‡ | Number of Subjects§ |
|-------------------------------|----------------------------------|-----------------------------------|--------------------------------|---------------------|---------------------|
| Warfarin                      | Warfarin                         | <i>Levaquin</i>                   | Levofloxacin                   | 95                  | 52                  |
| Moricizine                    | <i>Ethmozine</i>                 | Ethambutol                        | Ethambutol                     | 93                  | 0                   |
| Cyclophosphamide              | <b>Cyclophosphamide</b>          | <b>Cyclosporine</b>               | Cyclosporine                   | 92                  | 5                   |
| Tacrolimus                    | <i>Prograf</i>                   | <i>Prozac</i>                     | Fluoxetine                     | 92                  | 8                   |
| Dantrolene                    | <i>Dantrium</i>                  | <i>Danocrine</i>                  | Danazol                        | 91                  | 0                   |
| Amiodarone                    | <i>Cordarone</i>                 | <i>Cardene</i>                    | Nicardipine                    | 89                  | 0                   |
| Warfarin                      | <i>Coumadin</i>                  | <i>Avandia</i>                    | Rosiglitazone                  | 89                  | 2                   |
| Methotrexate                  | <i>Folex</i>                     | <i>Foltx</i>                      | Vitamin B Combination          | 89                  | 1                   |
| Ritonavir                     | <i>Norvir</i>                    | <i>Norvasc</i>                    | Amlodipine                     | 88                  | 1                   |
| Oxcarbazepine                 | Oxcarbazepine                    | Oxaprozin                         | Oxaprozin                      | 88                  | 11                  |
| Warfarin                      | <i>Coumadin</i>                  | <i>Cardura</i>                    | Doxazosin                      | 87                  | 5                   |
| Chlorambucil                  | <i>Leukeran</i>                  | Leucovorin                        | Leucovorin                     | 87                  | 0                   |
| Phenytoin Sodium              | Phenytoin Sodium                 | Nystatin                          | Nystatin                       | 87                  | 72                  |
| Topiramate                    | <i>Topamax</i>                   | <i>Tofranil</i>                   | Imipramine                     | 87                  | 59                  |
| Azathioprine                  | Azathioprine                     | Azithromycin                      | Azithromycin                   | 86                  | 63                  |
| Warfarin                      | <i>Coumadin</i>                  | Phytonadione                      | Phytonadione                   | 86                  | 5                   |
| Cyclosporine                  | <i>Neoral</i>                    | <i>Inderal</i>                    | Propranolol                    | 86                  | 9                   |
| Carbamazepine                 | Carbamazepine                    | Carisoprodol                      | Carisoprodol                   | 85                  | 17                  |
| Sodium Polystyrene Sulfonate  | <b><i>Kayexalate</i></b>         | <b><i>K Dur</i></b>               | Potassium                      | 85                  | 0                   |
| Levetiracetam                 | Levetiracetam                    | Levocarnitine                     | Levocarnitine                  | 85                  | 123                 |
| Clopidogrel                   | <i>Plavix</i>                    | <i>Paxil</i>                      | Paroxetine                     | 85                  | 6                   |
| Flecainide                    | <i>Tambocor</i>                  | Tamoxifen                         | Tamoxifen                      | 85                  | 0                   |
| Linezolid                     | <i>Zyvox</i>                     | <i>Zyflo</i>                      | Zileuton                       | 85                  | 0                   |
| Lamivudine                    | <i>Epivir</i>                    | <i>Elavil</i>                     | Amitriptyline                  | 84                  | 1                   |
| Isosorbide                    | <i>Isordil</i>                   | <i>Inderal</i>                    | Propranolol                    | 84                  | 2                   |
| Levetiracetam                 | <i>Keppra</i>                    | <i>Keflex</i>                     | Cephalexin                     | 84                  | 419                 |
| Lamotrigine                   | Lamotrigine                      | Lamivudine                        | Lamivudine                     | 84                  | 1                   |
| Procainamide                  | Procainamide                     | Probenecid                        | Probenecid                     | 84                  | 0                   |
| Quinine                       | Quinine                          | Quinidine                         | Quinidine                      | 84                  | 0                   |
| Oxcarbazepine                 | <i>Trileptal</i>                 | <i>Tegretol</i>                   | Carbamazepine                  | 84                  | 259                 |
| Digoxin                       | Digoxin                          | Levothyroxine                     | Levothyroxine                  | 83                  | 8                   |
| Letrozole                     | <i>Femara</i>                    | <i>Famvir</i>                     | Famciclovir                    | 83                  | 0                   |
| Furosemide                    | Furosemide                       | Fosinopril                        | Fosinopril                     | 83                  | 5                   |
| Tiagabine                     | <i>Gabitril</i>                  | <i>Glucotrol</i>                  | Glipizide                      | 83                  | 0                   |
| Isosorbide                    | <i>Imdur</i>                     | <i>Inderal</i>                    | Propranolol                    | 83                  | 2                   |
| Warfarin                      | <b><i>Jantoven</i></b>           | <b><i>Janumet</i></b>             | Sitagliptin + Metformin        | 83                  | 0                   |

|                                  |                     |                         |                       |    |     |
|----------------------------------|---------------------|-------------------------|-----------------------|----|-----|
| Lopinavir + Ritonavir            | <i>Kaletra</i>      | <i>Levitra</i>          | Vardenafil            | 83 | 0   |
| Flecainide                       | <b>Tambocor</b>     | <b>Temodar</b>          | Temozolomide          | 83 | 0   |
| Dofetilide                       | <i>Tikosyn</i>      | Ticlopidine             | Ticlopidine           | 83 | 0   |
| Clozapine                        | <b>Clozapine</b>    | <b>Clomipramine</b>     | Clomipramine          | 82 | 1   |
| Digoxin                          | <i>Lanoxin</i>      | Levothyroxine           | Levothyroxine         | 82 | 15  |
| Procabazine                      | <i>Matulane</i>     | <i>Materna</i>          | Prenatal Multivitamin | 82 | 0   |
| Nevirapine                       | Nevirapine          | Nefazodone              | Nefazodone            | 82 | 0   |
| Penicillin                       | Penicillin          | Penicillamine           | Penicillamine         | 82 | 0   |
| Phenytoin Sodium                 | Phenytoin Sodium    | <i>Feldene</i>          | Piroxicam             | 82 | 3   |
| Thalidomide                      | <i>Thalomid</i>     | Thiamine                | Thiamine              | 82 | 0   |
| Vancomycin                       | Vancomycin          | Valacyclovir            | Valacyclovir          | 82 | 1   |
| Amiodarone                       | Amiodarone          | Amantadine              | Amantadine            | 81 | 0   |
| Hydroxyurea                      | Hydroxyurea         | Hydroxychloroquine      | Hydroxychloroquine    | 81 | 0   |
| Lopinavir + Ritonavir            | <i>Kaletra</i>      | <i>Keppra</i>           | Levetiracetam         | 81 | 0   |
| Lamotrigine                      | <b>Lamotrigine</b>  | <b>Levothyroxine</b>    | Levothyroxine         | 81 | 58  |
| Leucovorin                       | <b>Leucovorin</b>   | <b>Leukeran</b>         | Chlorambucil          | 81 | 0   |
| Chlordiazepoxide + Amitriptyline | <i>Limbitrol</i>    | <i>Librium</i>          | Chlordiazepoxide      | 81 | 2   |
| Lithium                          | Lithium             | Chlordiazepoxide        | Chlordiazepoxide      | 81 | 38  |
| Topiramate                       | <i>Topamax</i>      | <i>Protonix</i>         | Pantoprazole          | 81 | 48  |
| Linezolid                        | <i>Zyvox</i>        | <i>Zithromax</i>        | Azithromycin          | 81 | 93  |
| Carbamazepine                    | <i>Carbatrol</i>    | Labetalol               | Labetalol             | 80 | 4   |
| Cyclosporine                     | <b>Cyclosporine</b> | <b>Cyclophosphamide</b> | Cyclophosphamide      | 80 | 5   |
| Phenytoin                        | <i>Dilantin</i>     | <i>Dilaudid</i>         | Hydromorphone         | 80 | 3   |
| Venlafaxine                      | <b>Effexor</b>      | <b>Eskalith</b>         | Lithium               | 80 | 99  |
| Lamotrigine                      | <i>Lamictal</i>     | <i>Lamisil</i>          | Terbinafine           | 80 | 26  |
| Sorafenib                        | <i>Nexavar</i>      | <i>Nexium</i>           | Esomeprazole          | 80 | 0   |
| Nitroglycerin                    | Nitroglycerin       | Nicotine                | Nicotine              | 80 | 0   |
| Amiodarone                       | <i>Pacerone</i>     | <i>Pancrease</i>        | Pancrelipase          | 80 | 3   |
| Reserpine                        | Reserpine           | Ropinirole              | Ropinirole            | 80 | 0   |
| Anastrozole                      | Anastrozole         | Anagrelide              | Anagrelide            | 79 | 0   |
| Ipratropium                      | <i>Atrovent</i>     | <i>Natru Vent</i>       | Xylometazoline        | 79 | 0   |
| Sodium Polystyrene Sulfonate     | <i>Kayexalate</i>   | <i>Kaopectate</i>       | Bismuth Subsalicylate | 79 | 0   |
| Lamivudine                       | Lamivudine          | Lamotrigine             | Lamotrigine           | 79 | 1   |
| Methotrexate                     | Methotrexate        | Metolazone              | Metolazone            | 79 | 0   |
| Nitroglycerin                    | Nitroglycerin       | <i>Neo-Synephrine</i>   | Phenylephrine         | 79 | 0   |
| Mercaptopurine                   | <i>Purinethol</i>   | Propylthiouracil        | Propylthiouracil      | 79 | 1   |
| Quinidine                        | Quinidine           | Quinine                 | Quinine               | 79 | 0   |
| Tamoxifen                        | Tamoxifen           | <i>Tambocor</i>         | Flecainide            | 79 | 0   |
| Topiramate                       | <i>Topamax</i>      | <i>Tegretol</i>         | Carbamazepine         | 79 | 301 |
| Topiramate                       | Topiramate          | <i>Toprol</i>           | Metoprolol            | 79 | 38  |
| Capecitabine                     | <i>Xeloda</i>       | <i>Xenical</i>          | Orlistat              | 79 | 0   |

|                         |                   |                   |                                    |    |     |
|-------------------------|-------------------|-------------------|------------------------------------|----|-----|
| Clomipramine            | <i>Anafranil</i>  | Enalapril         | Enalapril                          | 78 | 0   |
| Hydralazine             | <i>Apresoline</i> | Atropine          | Atropine                           | 78 | 0   |
| Warfarin                | <i>Coumadin</i>   | <i>Mephyton</i>   | Phytonadione                       | 78 | 5   |
| Dantrolene              | <i>Dantrium</i>   | Danazol           | Danazol                            | 78 | 0   |
| Warfarin                | <i>Jantoven</i>   | <i>Orvaten</i>    | Midodrine                          | 78 | 1   |
| Levothyroxine           | Levothyroxine     | Levofloxacin      | Levofloxacin                       | 78 | 113 |
| Cyclosporine            | <i>Neoral</i>     | <i>Neurontin</i>  | Gabapentin                         | 78 | 8   |
| Nitroglycerin           | Nitroglycerin     | Nitrofurantoin    | Nitrofurantoin                     | 78 | 5   |
| Naltrexone              | <i>Revia</i>      | <i>Revatio</i>    | Sildenafil                         | 78 | 0   |
| Topiramate              | <i>Topamax</i>    | Trazodone         | Trazodone                          | 78 | 330 |
| Albuterol               | Albuterol         | Labetalol         | Labetalol                          | 77 | 40  |
| Ipratropium             | <i>Atrovent</i>   | <i>Azmacort</i>   | Triamcinolone                      | 77 | 40  |
| Lamivudine + Zidovudine | <i>Combivir</i>   | <i>Combivent</i>  | Albuterol+Ipratropium              | 77 | 47  |
| Raloxifene              | <i>Evista</i>     | <i>Avandia</i>    | Rosiglitazone                      | 77 | 0   |
| Haloperidol             | Haloperidol       | Hydromorphone     | Hydromorphone                      | 77 | 0   |
| Lisinopril              | Lisinopril        | Lovastatin        | Lovastatin                         | 77 | 8   |
| Phytonadione            | <i>Mephyton</i>   | Methadone         | Methadone                          | 77 | 1   |
| Potassium               | <i>Slow K</i>     | <i>Slow Bid</i>   | Theophylline                       | 77 | 0   |
| Ticlopidine             | <i>Ticlid</i>     | <i>Tigan</i>      | Trimethobenzamide                  | 77 | 0   |
| Labetalol               | <i>Trandate</i>   | Trazodone         | Trazodone                          | 77 | 3   |
| Trientine               | Trientine         | Triamterene       | Triamterene                        | 77 | 0   |
| Acetylcysteine          | Acetylcysteine    | Acetazolamide     | Acetazolamide                      | 76 | 0   |
| Aripiprazole            | Aripiprazole      | Omeprazole        | Omeprazole                         | 76 | 61  |
| Atropine                | Atropine          | <i>Apresoline</i> | Hydralazine                        | 76 | 0   |
| Bicalutamide            | <i>Casodex</i>    | <i>Kapidex</i>    | Dexlansoprazole                    | 76 | 0   |
| Clindamycin             | Clindamycin       | <i>Clinoril</i>   | Sulindac                           | 76 | 25  |
| Digoxin                 | <i>Lanoxin</i>    | <i>Levoxyl</i>    | Levothyroxine                      | 76 | 15  |
| Levofloxacin            | <i>Levaquin</i>   | Levothyroxine     | Levothyroxine                      | 76 | 113 |
| Mexiletine              | <i>Mexitil</i>    | <i>Mestinon</i>   | Pyridostigmine                     | 76 | 0   |
| Gabapentin              | <i>Neurontin</i>  | <i>Motrin</i>     | Ibuprofen                          | 76 | 511 |
| Olanzapine              | Olanzapine        | Clonazepam        | Clonazepam                         | 76 | 254 |
| Prednisone              | Prednisone        | <i>Prilosec</i>   | Omeprazole                         | 76 | 719 |
| Mesoridazine            | <i>Serentil</i>   | Sertraline        | Sertraline                         | 76 | 3   |
| Topiramate              | Topiramate        | Torsemide         | Torsemide                          | 76 | 0   |
| Aminocaproic Acid       | <i>Amicar</i>     | <i>Omacor</i>     | Omega-3 Polyunsaturated Fatty Acid | 75 | 0   |
| Haloperidol             | Haloperidol       | Nadolol           | Nadolol                            | 75 | 0   |
| Levetiracetam           | <i>Keppra</i>     | <i>Kaletra</i>    | Lopinavir + Ritonavir              | 75 | 0   |
| Digoxin                 | <i>Lanoxin</i>    | <i>Lotensin</i>   | Benazepril                         | 75 | 18  |
| Digoxin                 | <i>Lanoxin</i>    | <i>Levaquin</i>   | Levofloxacin                       | 75 | 24  |
| Clopidogrel             | <i>Plavix</i>     | <i>Plendil</i>    | Felodipine                         | 75 | 0   |
| Cilostazol              | <i>Pletal</i>     | <i>Clozaril</i>   | Clozapine                          | 75 | 0   |
| Acetazolamide           | Acetazolamide     | Acetohexamide     | Acetohexamide                      | 74 | 0   |
| Amiodarone              | Amiodarone        | Amlodipine        | Amlodipine                         | 74 | 3   |
| Lamotrigine             | <i>Lamictal</i>   | <i>Geocillin</i>  | Carbenicillin                      | 74 | 1   |

|                    |                    |                       |                                             |    |      |
|--------------------|--------------------|-----------------------|---------------------------------------------|----|------|
| Levetiracetam      | Levetiracetam      | Lamotrigine           | Lamotrigine                                 | 74 | 388  |
| Fosamprenavir      | <i>Lexiva</i>      | <i>Levitra</i>        | Vardenafil                                  | 74 | 0    |
| Methimazole        | Methimazole        | Metaxalone            | Metaxalone                                  | 74 | 6    |
| Minoxidil          | Minoxidil          | Methotrexate          | Methotrexate                                | 74 | 0    |
| Tamoxifen          | <i>Nolvadex</i>    | <i>Norvasc</i>        | Amlodipine                                  | 74 | 0    |
| Primidone          | Primidone          | Primaquine            | Primaquine                                  | 74 | 0    |
| Nifedipine         | <i>Procardia</i>   | <i>Prevacid</i>       | Lansoprazole                                | 74 | 34   |
| Methylprednisolone | <i>Solu Medrol</i> | Salmeterol            | Salmeterol                                  | 74 | 145  |
| Isosorbide         | <i>Sorbitrate</i>  | Sorbitol              | Sorbitol                                    | 74 | 0    |
| Methimazole        | <i>Tapazole</i>    | <i>Topamax</i>        | Topiramate                                  | 74 | 3    |
| Olanzapine         | <i>Zyprexa</i>     | <i>Zelapar</i>        | Selegiline                                  | 74 | 0    |
| Quinapril          | <i>Accupril</i>    | <i>Amaryl</i>         | Glimepiride                                 | 73 | 4    |
| Cyclosporine       | Cyclosporine       | Cycloserine           | Cycloserine                                 | 73 | 0    |
| Fludrocortisone    | <i>Florinef</i>    | <i>Fioricet</i>       | Butalbital +<br>Acetaminophen<br>+ Caffeine | 73 | 0    |
| Folinic Acid       | Folinic Acid       | Folic Acid            | Folic Acid                                  | 73 | 8    |
| Isosorbide         | <i>Isordil</i>     | <i>Isoptin</i>        | Verapamil                                   | 73 | 0    |
| Digoxin            | <i>Lanoxin</i>     | <i>Levsin</i>         | Hyoscyamine                                 | 73 | 24   |
| Prednisolone       | <i>Pediapred</i>   | <i>Pediazole</i>      | Erythromycin +<br>Sulfasoxazole             | 73 | 2101 |
| Penicillamine      | Penicillamine      | Penicillin            | Penicillin                                  | 73 | 0    |
| Probenecid         | Probenecid         | <i>Procanbid</i>      | Procainamide                                | 73 | 0    |
| Procainamide       | <i>Procanbid</i>   | Probenecid            | Probenecid                                  | 73 | 0    |
| Ritodrine          | Ritodrine          | <i>Ritalin</i>        | Methylphenidate                             | 73 | 0    |
| Sodium Chloride    | Sodium Chloride    | Potassium<br>Chloride | Potassium<br>Chloride                       | 73 | 57   |
| Flecainide         | <i>Tambocor</i>    | <i>Pamelor</i>        | Nortriptylline                              | 73 | 0    |
| Ticlopidine        | Ticlopidine        | Tolterodine           | Tolterodine                                 | 73 | 0    |
| Sertraline         | <i>Zoloft</i>      | <i>Zocor</i>          | Simvastatin                                 | 73 | 24   |
| Glimepiride        | <i>Amaryl</i>      | <i>Reminyl</i>        | Galantamine                                 | 72 | 0    |
| Chlorpromazine     | Chlorpromazine     | Chlorthalidone        | Chlorthalidone                              | 72 | 0    |
| Chlorpromazine     | Chlorpromazine     | Clomipramine          | Clomipramine                                | 72 | 2    |
| Clozapine          | Clozapine          | Clofazimine           | Clofazimine                                 | 72 | 0    |
| Desipramine        | Desipramine        | Disopyramide          | Disopyramide                                | 72 | 0    |
| Letrozole          | <i>Femara</i>      | <i>Femhrt</i>         | Estrogen +<br>Progesterone                  | 72 | 0    |
| Levothyroxine      | Levothyroxine      | Levorphanol           | Levorphanol                                 | 72 | 0    |
| Pyrimethamine      | Pyrimethamine      | Pyrazinamide          | Pyrazinamide                                | 72 | 0    |
| Sildenafil         | <i>Revatio</i>     | <i>Revia</i>          | Naltrexone                                  | 72 | 0    |
| Rifabutin          | Rifabutin          | <i>Rifadin</i>        | Rifampin                                    | 72 | 0    |
| Doxepin            | <i>Sinequan</i>    | <i>Singulair</i>      | Montelukast                                 | 72 | 94   |
| Benazepril         | Benazepril         | Benzotropine          | Benzotropine                                | 71 | 2    |
| Chlordiazepoxide   | Chlordiazepoxide   | Chlorpromazine        | Chlorpromazine                              | 71 | 11   |
| Disopyramide       | Disopyramide       | Desipramine           | Desipramine                                 | 71 | 0    |
| Doxepin            | Doxepin            | Doxycycline           | Doxycycline                                 | 71 | 65   |
| Gabapentin         | Gabapentin         | Gatifloxacin          | Gatifloxacin                                | 71 | 14   |
| Haloperidol        | <i>Haldol</i>      | <i>Stadol</i>         | Butorphanol                                 | 71 | 0    |

|                             |                  |                  |                 |    |      |
|-----------------------------|------------------|------------------|-----------------|----|------|
| Isosorbide                  | Isosorbide       | Isoniazid        | Isoniazid       | 71 | 0    |
| Digoxin                     | <i>Lanoxin</i>   | <i>Lasix</i>     | Furosemide      | 71 | 447  |
| Phytonadione                | <i>Mephyton</i>  | <i>Coumadin</i>  | Warfarin        | 71 | 5    |
| N-Acetylcysteine            | <i>Mucomyst</i>  | <i>Mucinex</i>   | Guaifenesin     | 71 | 0    |
| Nadolol                     | Nadolol          | Nateglinide      | Nateglinide     | 71 | 0    |
| Pancrelipase                | <i>Pancrease</i> | <i>Pacerone</i>  | Amiodarone      | 71 | 3    |
| Zidovudine                  | <i>Retrovir</i>  | Acyclovir        | Acyclovir       | 71 | 2    |
| Salmeterol                  | <i>Serevent</i>  | <i>Zoloft</i>    | Sertraline      | 71 | 97   |
| Carbamazepine               | <i>Tegretol</i>  | <i>Tylenol</i>   | Acetaminophen   | 71 | 510  |
| Imipramine                  | <i>Tofranil</i>  | <i>Topamax</i>   | Topiramate      | 71 | 59   |
| Metoprolol                  | <i>Toprol</i>    | <i>Tegretol</i>  | Carbamazepine   | 71 | 11   |
| Valsartan                   | Valsartan        | Simvastatin      | Simvastatin     | 71 | 10   |
| Hydrocodone + Acetaminophen | <i>Vicodin</i>   | <i>Valium</i>    | Diazepam        | 71 | 3330 |
| Exemestane                  | <i>Aromasin</i>  | <i>Arimidex</i>  | Anastrozole     | 70 | 0    |
| Azithromycin                | Azithromycin     | Azathioprine     | Azathioprine    | 70 | 63   |
| Acetazolamide               | <i>Diamox</i>    | Diazoxide        | Diazoxide       | 70 | 0    |
| Azathioprine                | <i>Imuran</i>    | <i>Imdur</i>     | Isosorbide      | 70 | 0    |
| Levofloxacin                | Levofloxacin     | Levodopa         | Levodopa        | 70 | 0    |
| Loxapine                    | <i>Loxitane</i>  | <i>Soriatane</i> | Acitretin       | 70 | 0    |
| Methimazole                 | Methimazole      | Metolazone       | Metolazone      | 70 | 0    |
| Metyrapone                  | Metyrapone       | Metyrosine       | Metyrosine      | 70 | 0    |
| Prazosin                    | <i>Minipress</i> | Minoxidil        | Minoxidil       | 70 | 0    |
| Thiothixene                 | <i>Navane</i>    | <i>Artane</i>    | Trihexyphenidyl | 70 | 0    |
| Nelfinavir                  | Nelfinavir       | Nefazodone       | Nefazodone      | 70 | 1    |
| Tamoxifen                   | <i>Nolvadex</i>  | <i>Flomax</i>    | Tamsulosin      | 70 | 0    |
| Penicillamine               | Penicillamine    | Penicillin       | Penicillin      | 70 | 0    |
| Metolazone                  | <i>Zaroxolyn</i> | <i>Zyprexa</i>   | Olanzapine      | 70 | 1    |
| Quinapril                   | <i>Accupril</i>  | <i>Accutane</i>  | Isotretinoin    | 69 | 2    |
| Moxifloxacin                | <i>Avelox</i>    | <i>Avapro</i>    | Irbesartan      | 69 | 1    |
| Ciprofloxacin               | Ciprofloxacin    | Cephalexin       | Cephalexin      | 69 | 3266 |
| Clomiphene                  | <i>Clomid</i>    | Clomipramine     | Clomipramine    | 69 | 0    |
| Cycloserine                 | Cycloserine      | Cyclosporine     | Cyclosporine    | 69 | 0    |
| Doxepin                     | Doxepin          | Diazepam         | Diazepam        | 69 | 22   |
| Amitriptyline               | <i>Elavil</i>    | Enalapril        | Enalapril       | 69 | 24   |
| Isosorbide                  | <i>Isordil</i>   | <i>Zestril</i>   | Lisinopril      | 69 | 1    |
| Isosorbide                  | Isosorbide       | Indapamide       | Indapamide      | 69 | 0    |
| Warfarin                    | <i>Jantoven</i>  | <i>Januvia</i>   | Sitagliptin     | 69 | 1    |
| Nifedipine                  | Nifedipine       | Nortriptyline    | Nortriptyline   | 69 | 1    |
| Nitroglycerin               | <i>Nitro Bid</i> | <i>Macrobid</i>  | Nitrofurantoin  | 69 | 5    |
| Amlodipine                  | <i>Norvasc</i>   | <i>Nexium</i>    | Esomeprazole    | 69 | 69   |
| Prednisone                  | Prednisone       | Prazosin         | Prazosin        | 69 | 4    |
| Saquinavir                  | Saquinavir       | <i>Sinequan</i>  | Doxepin         | 69 | 0    |
| Atenolol                    | <i>Tenormin</i>  | <i>Imuran</i>    | Azathioprine    | 69 | 6    |
| Thiethylperazine            | Thiethylperazine | <i>Brethine</i>  | Terbutaline     | 69 | 0    |
| Alprazolam                  | <i>Xanax</i>     | <i>Tenex</i>     | Guanfacine      | 69 | 45   |
| Sertraline                  | <i>Zoloft</i>    | <i>Zyrtec</i>    | Cetirizine      | 69 | 2710 |
| Olanzapine                  | <i>Zyprexa</i>   | <i>Zebeta</i>    | Bisoprolol      | 69 | 0    |

|                          |                    |                    |                                       |    |      |
|--------------------------|--------------------|--------------------|---------------------------------------|----|------|
| Exemestane               | <i>Aromasin</i>    | <i>Aygestin</i>    | Norethindrone                         | 68 | 0    |
| Mesalamine               | <i>Asacol</i>      | <i>Visicol</i>     | Sodium Biphosphate + Sodium Phosphate | 68 | 6    |
| Triamcinolone            | <i>Azmacort</i>    | <i>Nasacort</i>    | Triamcinolone                         | 68 | 87   |
| Bromocriptine            | Bromocriptine      | <i>Proamatine</i>  | Midodrine                             | 68 | 0    |
| Divalproex               | Divalproex         | <i>Valtrex</i>     | Valacyclovir                          | 68 | 84   |
| Venlafaxine              | <i>Effexor</i>     | <i>Exelon</i>      | Rivastigmine                          | 68 | 0    |
| Enalapril                | Enalapril          | <i>Elavil</i>      | Amitriptyline                         | 68 | 24   |
| Raloxifene               | <i>Evista</i>      | <i>Avinza</i>      | Morphine                              | 68 | 1    |
| Fluticasone              | <i>Flovent</i>     | <i>Atrovent</i>    | Ipratropium                           | 68 | 1214 |
| Hydroxychloroquine       | Hydroxychloroquine | Hydroxyurea        | Hydroxyurea                           | 68 | 0    |
| Propranolol              | <i>Inderal</i>     | <i>Neoral</i>      | Cyclosporine                          | 68 | 9    |
| Lamotrigine              | <i>Lamictal</i>    | <i>Lactinex</i>    | Lactobacillus                         | 68 | 0    |
| Methadone                | Methadone          | Dexmethylphenidat  | Dexmethylphenidat                     | 68 | 0    |
| Minoxidil                | Minoxidil          | <i>Minipress</i>   | Prazosin                              | 68 | 0    |
| Olanzapine               | Olanzapine         | Olsalazine         | Olsalazine                            | 68 | 1    |
| Midodrine                | <i>Orvaten</i>     | <i>Jantoven</i>    | Warfarin                              | 68 | 1    |
| Risperidone              | Risperidone        | Rosiglitazone      | Rosiglitazone                         | 68 | 0    |
| Spironolactone           | Spironolactone     | Simethicone        | Simethicone                           | 68 | 5    |
| Tacrolimus               | Tacrolimus         | Tamsulosin         | Tamsulosin                            | 68 | 0    |
| Fluticasone + Salmeterol | <i>Advair</i>      | <i>Atrovent</i>    | Ipratropium                           | 67 | 869  |
| Amitriptyline            | Amitriptyline      | Aminophylline      | Aminophylline                         | 67 | 0    |
| Rosiglitazone            | <i>Avandia</i>     | <i>Coumadin</i>    | Warfarin                              | 67 | 2    |
| Chlordiazepoxide         | Chlordiazepoxide   | Lithium            | Lithium                               | 67 | 38   |
| Clonazepam               | Clonazepam         | Clozapine          | Clozapine                             | 67 | 4    |
| Clonidine                | Clonidine          | Clonazepam         | Clonazepam                            | 67 | 569  |
| Acetazolamide            | <i>Diamox</i>      | <i>Amoxil</i>      | Amoxicillin                           | 67 | 107  |
| Indapamide               | Indapamide         | Isradipine         | Isradipine                            | 67 | 0    |
| Levofloxacin             | <i>Levaquin</i>    | Warfarin           | Warfarin                              | 67 | 52   |
| Methylegonovine          | Methylegonovine    | Methylprednisolone | Methylprednisolone                    | 67 | 37   |
| Metolazone               | Metolazone         | Metoclopramide     | Metoclopramide                        | 67 | 8    |
| Misoprostol              | Misoprostol        | Methimazole        | Methimazole                           | 67 | 0    |
| Gabapentin               | <i>Neurontin</i>   | <i>Noroxin</i>     | Norfloxacin                           | 67 | 1    |
| Albuterol                | <i>Proventil</i>   | <i>Provigil</i>    | Modafinil                             | 67 | 68   |
| Pyridostigmine           | Pyridostigmine     | Pyridoxine         | Pyridoxine                            | 67 | 0    |
| Ketorolac                | <i>Toradol</i>     | <i>Tofranil</i>    | Imipramine                            | 67 | 14   |
| Trandolapril             | Trandolapril       | Tenofovir          | Tenofovir                             | 67 | 0    |
| Dolasetron               | <i>Anzemet</i>     | <i>Avandamet</i>   | Rosiglitazone + Metformin             | 66 | 0    |
| Atenolol                 | Atenolol           | Albuterol          | Albuterol                             | 66 | 196  |
| Diphenhydramine          | <i>Benadryl</i>    | <i>Bentyl</i>      | Dicyclomine                           | 66 | 114  |
| Carvedilol               | Carvedilol         | Carbidopa          | Carbidopa                             | 66 | 0    |

|                          |                     |                     |                                     |    |      |
|--------------------------|---------------------|---------------------|-------------------------------------|----|------|
| Isosorbide               | Isosorbide          | Isotretinoin        | Isotretinoin                        | 66 | 0    |
| Lamotrigine              | Lamotrigine         | Levetiracetam       | Levetiracetam                       | 66 | 388  |
| Molindone                | Molindone           | Meloxicam           | Meloxicam                           | 66 | 0    |
| Nefazodone               | Nefazodone          | Nevirapine          | Nevirapine                          | 66 | 0    |
| Gabapentin               | <i>Neurontin</i>    | Nitrofurantoin      | Nitrofurantoin                      | 66 | 125  |
| Nitrofurantoin           | Nitrofurantoin      | Nitroglycerin       | Nitroglycerin                       | 66 | 5    |
| Estazolam                | <i>Prosom</i>       | Prazosin            | Prazosin                            | 66 | 0    |
| Acyclovir                | <i>Zovirax</i>      | <i>Zyloprim</i>     | Allopurinol                         | 66 | 6    |
| Ursodiol                 | <i>Actigall</i>     | <i>Actiq</i>        | Fentanyl                            | 65 | 2    |
| Fluticasone + Salmeterol | <i>Advair</i>       | <i>Advil</i>        | Ibuprofen                           | 65 | 3295 |
| Glimepiride              | <i>Amaryl</i>       | <i>Avandia</i>      | Rosiglitazone                       | 65 | 4    |
| Torsemide                | <i>Demadex</i>      | <i>Diamox</i>       | Acetazolamide                       | 65 | 0    |
| Meperidine               | <i>Demerol</i>      | <i>Demadex</i>      | Torsemide                           | 65 | 1    |
| Enalapril                | Enalapril           | <i>Anafranil</i>    | Clomipramine                        | 65 | 0    |
| Fluoxetine               | Fluoxetine          | Fosinopril          | Fosinopril                          | 65 | 2    |
| Atorvastatin             | <i>Lipitor</i>      | Labetalol           | Labetalol                           | 65 | 6    |
| Nitrofurantoin           | Nitrofurantoin      | <i>Neurontin</i>    | Gabapentin                          | 65 | 125  |
| Nitroglycerin            | Nitroglycerin       | Nystatin            | Nystatin                            | 65 | 6    |
| Clopidogrel              | <i>Plavix</i>       | <i>Mavik</i>        | Trandolapril                        | 65 | 0    |
| Reserpine                | Reserpine           | <i>Risperdal</i>    | Risperidone                         | 65 | 1    |
| Risperidone              | <i>Risperdal</i>    | <i>Rocaltrol</i>    | Calcitriol                          | 65 | 9    |
| Sertraline               | Sertraline          | Olanzapine          | Olanzapine                          | 65 | 616  |
| Metoprolol               | <i>Toprol</i>       | Tramadol            | Tramadol                            | 65 | 87   |
| Tretinoin                | Tretinoin           | <i>Tenormin</i>     | Atenolol                            | 65 | 0    |
| Vancomycin               | Vancomycin          | <i>Vibramycin</i>   | Doxycycline                         | 65 | 0    |
| Amprenavir               | <i>Agenerase</i>    | <i>Aggrenox</i>     | Acetylsalicylic Acid + Dipyridamole | 64 | 0    |
| Anastrozole              | <i>Arimidex</i>     | <i>Aromasin</i>     | Exemestane                          | 64 | 0    |
| Chlorpropamide           | <i>Diabinese</i>    | <i>Diamox</i>       | Acetazolamide                       | 64 | 0    |
| Felodipine               | Felodipine          | Selegiline          | Selegiline                          | 64 | 0    |
| Hydrochlorothiazide      | Hydrochlorothiazide | Hydroxychloroquine  | Hydroxychloroquine                  | 64 | 13   |
| Levofloxacin             | <i>Levaquin</i>     | <i>Lariam</i>       | Mefloquine                          | 64 | 1    |
| Levothyroxine            | <i>Levoxyl</i>      | <i>Lanoxin</i>      | Digoxin                             | 64 | 15   |
| Benazepril               | <i>Lotensin</i>     | <i>Lioresal</i>     | Baclofen                            | 64 | 3    |
| Methylprednisolone       | Methylprednisolone  | Medroxyprogesterone | Medroxyprogesterone                 | 64 | 191  |
| Methysergide             | Methysergide        | Methylergonovine    | Methylergonovine                    | 64 | 0    |
| Thiothixene              | <i>Navane</i>       | <i>Norvasc</i>      | Amlodipine                          | 64 | 0    |
| Oxandrolone              | <i>Oxandrin</i>     | <i>Oxycontin</i>    | Oxycodone                           | 64 | 9    |
| Primidone                | Primidone           | Pyridoxine          | Pyridoxine                          | 64 | 0    |
| Fluoxetine               | <i>Prozac</i>       | <i>Prelone</i>      | Prednisolone                        | 64 | 347  |
| Mirtazapine              | <i>Remeron</i>      | <i>Premarin</i>     | Conjugated Estrogens                | 64 | 17   |
| Quetiapine               | <i>Seroquel</i>     | <i>Sinequan</i>     | Doxepin                             | 64 | 58   |
| Verapamil                | Verapamil           | Lisinopril          | Lisinopril                          | 64 | 14   |

|                                       |                   |                     |                          |    |      |
|---------------------------------------|-------------------|---------------------|--------------------------|----|------|
| Bisoprolol                            | <i>Zebeta</i>     | <i>Zyprexa</i>      | Olanzapine               | 64 | 0    |
| Stavudine                             | <i>Zerit</i>      | <i>Zyrtec</i>       | Cetirizine               | 64 | 23   |
| Lisinopril                            | <i>Zestril</i>    | <i>Zerit</i>        | Stavudine                | 64 | 2    |
| Azithromycin                          | <i>Zithromax</i>  | <i>Fosamax</i>      | Alendronate Sodium       | 64 | 61   |
| Aminophylline                         | Aminophylline     | Amitriptyline       | Amitriptyline            | 63 | 0    |
| Albuterol+Ipratropium                 | <i>Combivent</i>  | <i>Combipres</i>    | Clonidine+Chlorthalidone | 63 | 3198 |
| Dexamethasone                         | Dexamethasone     | Methadone           | Methadone                | 63 | 8    |
| Butalbital + Acetaminophen + Caffeine | <i>Fioricet</i>   | <i>Florinef</i>     | Fludrocortisone          | 63 | 0    |
| Labetalol                             | Labetalol         | <i>Felbatol</i>     | Felbamate                | 63 | 0    |
| Lamotrigine                           | <i>Lamictal</i>   | <i>Loxitane</i>     | Loxapine                 | 63 | 1    |
| Levodopa                              | Levodopa          | Levofloxacin        | Levofloxacin             | 63 | 0    |
| Pregabalin                            | <i>Lyrica</i>     | <i>Lopressor</i>    | Metoprolol               | 63 | 5    |
| Mesalamine                            | Mesalamine        | Megestrol           | Megestrol                | 63 | 1    |
| Metronidazole                         | Metronidazole     | Methocarbamol       | Methocarbamol            | 63 | 135  |
| Lisinopril                            | <i>Prinivil</i>   | <i>Pravachol</i>    | Pravastatin              | 63 | 28   |
| Modafinil                             | <i>Provigil</i>   | <i>Seroquel</i>     | Quetiapine               | 63 | 27   |
| Ribavirin                             | Ribavirin         | <i>Robaxin</i>      | Methocarbamol            | 63 | 0    |
| Perphenazine                          | <i>Trilafon</i>   | <i>Aceon</i>        | Perindopril              | 63 | 0    |
| Doxycycline                           | <i>Vibramycin</i> | Vancomycin          | Vancomycin               | 63 | 0    |
| Ziprasidone                           | Ziprasidone       | Zonisamide          | Zonisamide               | 63 | 10   |
| Fluticasone + Salmeterol              | <i>Advair</i>     | <i>Altocor</i>      | Lovastatin               | 62 | 2    |
| Alendronate Sodium                    | <i>Fosamax</i>    | Fosinopril          | Fosinopril               | 62 | 0    |
| Fosinopril                            | Fosinopril        | Fluoxetine          | Fluoxetine               | 62 | 2    |
| Hydralazine                           | Hydralazine       | Hydrocortisone      | Hydrocortisone           | 62 | 3    |
| Lisinopril                            | Lisinopril        | Losartan            | Losartan                 | 62 | 26   |
| Lorazepam                             | Lorazepam         | Clonazepam          | Clonazepam               | 62 | 486  |
| Methadone                             | Methadone         | <i>Mephyton</i>     | Phytonadione             | 62 | 1    |
| Metyrosine                            | Metyrosine        | Metyrapone          | Metyrapone               | 62 | 0    |
| Hydrochlorothiazide                   | <i>Microzide</i>  | <i>Micronase</i>    | Glyburide                | 62 | 12   |
| Nortriptyline                         | Nortriptyline     | Nifedipine          | Nifedipine               | 62 | 1    |
| Paroxetine                            | Paroxetine        | <i>Feldene</i>      | Piroxicam                | 62 | 22   |
| Levalbuterol                          | <i>Xopenex</i>    | <i>Xanax</i>        | Alprazolam               | 62 | 81   |
| Cefuroxime                            | <i>Zinacef</i>    | <i>Zithromax</i>    | Azithromycin             | 62 | 9099 |
| Sertraline                            | <i>Zoloft</i>     | <i>Zithromax</i>    | Azithromycin             | 62 | 4784 |
| Amlodipine                            | Amlodipine        | Amiodarone          | Amiodarone               | 61 | 3    |
| Atenolol                              | Atenolol          | <i>Actonel</i>      | Risedronate              | 61 | 1    |
| Chlorothiazide                        | Chlorothiazide    | Chloral Hydrate     | Chloral Hydrate          | 61 | 3    |
| Acetazolamide                         | <i>Diamox</i>     | <i>Diuril</i>       | Chlorothiazide           | 61 | 2    |
| Diltiazem                             | Diltiazem         | Diazepam            | Diazepam                 | 61 | 6    |
| Famciclovir                           | <i>Famvir</i>     | <i>Femara</i>       | Letrozole                | 61 | 0    |
| Gabapentin                            | Gabapentin        | Gemfibrozil         | Gemfibrozil              | 61 | 0    |
| Hydralazine                           | Hydralazine       | Hydrochlorothiazide | Hydrochlorothiazide      | 61 | 16   |



|                              |                     |                   |                          |    |      |
|------------------------------|---------------------|-------------------|--------------------------|----|------|
|                              |                     | de                | de                       |    |      |
| Mefloquine                   | <i>Lariam</i>       | <i>Levaquin</i>   | Levofloxacin             | 61 | 1    |
| Metolazone                   | Metolazone          | Methotrexate      | Methotrexate             | 61 | 0    |
| Potassium                    | <i>Micro K</i>      | <i>Macrobid</i>   | Nitrofurantoin           | 61 | 76   |
| Propylthiouracil             | Propylthiouracil    | <i>Purinethol</i> | Mercaptopurine           | 61 | 1    |
| Rifampin                     | Rifampin            | Rifaximin         | Rifaximin                | 61 | 0    |
| Tacrolimus                   | Tacrolimus          | Tolterodine       | Tolterodine              | 61 | 2    |
| Temozolomide                 | <i>Temodar</i>      | <i>Tambocor</i>   | Flecainide               | 61 | 0    |
| Ziprasidone                  | Ziprasidone         | <i>Zyprexa</i>    | Olanzapine               | 61 | 353  |
| Zonisamide                   | <i>Zonegran</i>     | <i>Sinequan</i>   | Doxepin                  | 61 | 0    |
| Acetazolamide                | Acetazolamide       | Acetaminophen     | Acetaminophen            | 60 | 68   |
| Rosiglitazone                | <i>Avandia</i>      | <i>Cardura</i>    | Doxazosin                | 60 | 1    |
| Clofazimine                  | Clofazimine         | Clozapine         | Clozapine                | 60 | 0    |
| Clomipramine                 | Clomipramine        | Chlorpromazine    | Chlorpromazine           | 60 | 2    |
| Sodium Polystyrene Sulfonate | <i>Kayexalate</i>   | <i>Carafate</i>   | Sucralfate               | 60 | 0    |
| Lisinopril                   | Lisinopril          | <i>Risperdal</i>  | Risperidone              | 60 | 31   |
| Quetiapine                   | <i>Seroquel</i>     | <i>Desyrel</i>    | Trazodone                | 60 | 935  |
| Ipratropium                  | <i>Atrovent</i>     | <i>Advair</i>     | Fluticasone + Salmeterol | 59 | 869  |
| Ketorolac                    | Ketorolac           | Methadone         | Methadone                | 59 | 3    |
| Lorazepam                    | Lorazepam           | Loperamide        | Loperamide               | 59 | 21   |
| Phenytoin Sodium             | Phenytoin Sodium    | Phytonadione      | Phytonadione             | 59 | 5    |
| Phytonadione                 | Phytonadione        | Phenytoin Sodium  | Phenytoin Sodium         | 59 | 5    |
| Tamsulosin                   | Tamsulosin          | Tacrolimus        | Tacrolimus               | 59 | 0    |
| Trazodone                    | Trazodone           | Tramadol          | Tramadol                 | 59 | 376  |
| Atenolol                     | Atenolol            | Allopurinol       | Allopurinol              | 58 | 6    |
| Bisoprolol                   | Bisoprolol          | <i>Risperdal</i>  | Risperidone              | 58 | 5    |
| Clonazepam                   | Clonazepam          | Olanzapine        | Olanzapine               | 58 | 254  |
| Hydroxyurea                  | <i>Hydrea</i>       | <i>Hytrin</i>     | Terazosin                | 58 | 0    |
| Levofloxacin                 | <i>Levaquin</i>     | <i>Lanoxin</i>    | Digoxin                  | 58 | 24   |
| Trandolapril                 | <i>Mavik</i>        | <i>Plavix</i>     | Clopidogrel              | 58 | 0    |
| Metronidazole                | Metronidazole       | Metoclopramide    | Metoclopramide           | 58 | 1381 |
| Gabapentin                   | <i>Neurontin</i>    | <i>Zarontin</i>   | Ethosuximide             | 58 | 11   |
| Paroxetine                   | <i>Paxil</i>        | <i>Pravachol</i>  | Pravastatin              | 58 | 11   |
| Phenobarbital                | Phenobarbital       | <i>Phenergan</i>  | Promethazine             | 58 | 310  |
| Nifedipine                   | <i>Procardia</i>    | <i>Provera</i>    | Medroxyprogesterone      | 58 | 43   |
| Reserpine                    | Reserpine           | Risperidone       | Risperidone              | 58 | 0    |
| Risperidone                  | Risperidone         | Buspirone         | Buspirone                | 58 | 23   |
| Selegiline                   | Selegiline          | Felodipine        | Felodipine               | 58 | 0    |
| Pioglitazone                 | <i>Actos</i>        | <i>Altace</i>     | Ramipril                 | 57 | 9    |
| Ampicillin                   | Ampicillin          | Aminophylline     | Aminophylline            | 57 | 0    |
| Hydrochlorothiazide          | Hydrochlorothiazide | Hydrocortisone    | Hydrocortisone           | 57 | 53   |
| Isosorbide                   | <i>Imdur</i>        | <i>Imuran</i>     | Azathioprine             | 57 | 0    |

|                                        |                    |                   |                                                     |    |     |
|----------------------------------------|--------------------|-------------------|-----------------------------------------------------|----|-----|
| Lanthanum                              | Lanthanum          | Lithium           | Lithium                                             | 57 | 0   |
| Furosemide                             | <i>Lasix</i>       | <i>Lanoxin</i>    | Digoxin                                             | 57 | 447 |
| Desipramine                            | <i>Norpramin</i>   | <i>Normodyne</i>  | Labetalol                                           | 57 | 0   |
| Promethazine                           | Promethazine       | Perphenazine      | Perphenazine                                        | 57 | 7   |
| Vitamin K                              | Vitamin K          | <i>Urocit</i>     | Potassium citrate                                   | 57 | 0   |
| Sulindac                               | <i>Clinoril</i>    | <i>Elavil</i>     | Amitriptyline                                       | 56 | 14  |
| Midodrine                              | Midodrine          | <i>Midamor</i>    | Amiloride                                           | 56 | 0   |
| Oxazepam                               | Oxazepam           | Lorazepam         | Lorazepam                                           | 56 | 5   |
| Temazepam                              | <i>Restoril</i>    | Lisinopril        | Lisinopril                                          | 56 | 13  |
| Rifampin + Isoniazid                   | <i>Rifamate</i>    | <i>Rifadin</i>    | Rifampin                                            | 56 | 1   |
| Citric Acid + Sodium Citrate           | <i>Bicitra</i>     | <i>Polycitra</i>  | Potassium Citrate + Sodium Citrate + Citric Acid    | 55 | 1   |
| Levothyroxine                          | Levothyroxine      | <i>Lanoxin</i>    | Digoxin                                             | 55 | 15  |
| Risedronate                            | Risedronate        | Risperidone       | Risperidone                                         | 55 | 0   |
| Carbamazepine                          | <i>Tegretol</i>    | <i>Trental</i>    | Pentoxifylline                                      | 55 | 2   |
| Olanzapine                             | <i>Zyprexa</i>     | <i>Reprexain</i>  | Hydrocodone + Ibuprofen                             | 55 | 16  |
| Ciprofloxacin                          | <i>Cipro</i>       | <i>Cleocin</i>    | Clindamycin                                         | 54 | 402 |
| Amitriptyline                          | <i>Elavil</i>      | <i>Epivir</i>     | Lamivudine                                          | 54 | 1   |
| Sitagliptin + Metformin                | <i>Janumet</i>     | <i>Sinemet</i>    | Carbidopa + Levodopa                                | 54 | 0   |
| Levofloxacin                           | <i>Levaquin</i>    | <i>Levoxyl</i>    | Levothyroxine                                       | 54 | 113 |
| Fluvoxamine                            | <i>Luvox</i>       | <i>Lasix</i>      | Furosemide                                          | 54 | 1   |
| Esomeprazole                           | <i>Nexium</i>      | <i>Norvasc</i>    | Amlodipine                                          | 54 | 69  |
| Amlodipine                             | <i>Norvasc</i>     | <i>Navane</i>     | Thiothixene                                         | 54 | 0   |
| Oxandrolone                            | <i>Oxandrin</i>    | <i>Prandin</i>    | Repaglinide                                         | 54 | 0   |
| Rifampin                               | <i>Rifadin</i>     | Rifabutin         | Rifabutin                                           | 54 | 0   |
| Risperidone                            | <i>Risperdal</i>   | Reserpine         | Reserpine                                           | 54 | 1   |
| Salmeterol                             | <i>Serevent</i>    | Sertraline        | Sertraline                                          | 54 | 97  |
| Propranolol                            | <i>Inderal</i>     | <i>Adderall</i>   | Dextroamphetamine+Amphetamine                       | 53 | 207 |
| Isoniazid                              | Isoniazid          | Isosorbide        | Isosorbide                                          | 53 | 0   |
| Hydrochlorothiazide                    | <i>Microzide</i>   | <i>Maxzide</i>    | Hydrochlorothiazide + Triamterene                   | 53 | 0   |
| Midodrine                              | Midodrine          | Minoxidil         | Minoxidil                                           | 53 | 0   |
| Molindone                              | <i>Moban</i>       | <i>Mobic</i>      | Meloxicam                                           | 53 | 0   |
| Potassium phosphate + Sodium phosphate | <i>Neutra Phos</i> | <i>Nephrocaps</i> | Vitamin B Complex + Vitamin C + Biotin + Folic Acid | 53 | 6   |
| Tiotropium                             | <i>Spiriva</i>     | <i>Inspra</i>     | Eplerenone                                          | 53 | 0   |
| Chlorpromazine                         | Chlorpromazine     | Chlorpropamide    | Chlorpropamide                                      | 52 | 0   |
| Clomipramine                           | Clomipramine       | Clomiphene        | Clomiphene                                          | 52 | 0   |
| Furosemide                             | <i>Lasix</i>       | <i>Luvox</i>      | Fluvoxamine                                         | 52 | 1   |

|                                  |                     |                 |                                   |    |      |
|----------------------------------|---------------------|-----------------|-----------------------------------|----|------|
| Propranolol                      | Propranolol         | Prednisone      | Prednisone                        | 52 | 303  |
| Rosiglitazone                    | <i>Avandia</i>      | <i>Avelox</i>   | Moxifloxacin                      | 51 | 6    |
| Dexamethasone                    | Dexamethasone       | Doxazosin       | Doxazosin                         | 51 | 1    |
| Betaxolol                        | <i>Kerlone</i>      | Ketorolac       | Ketorolac                         | 51 | 0    |
| Diphenoxylate + Atropine         | <i>Lomotil</i>      | <i>Lanoxin</i>  | Digoxin                           | 51 | 7    |
| Misoprostol                      | Misoprostol         | Mifepristone    | Mifepristone                      | 51 | 0    |
| Sulfamethoxazole + Trimethoprim  | <i>Sepra</i>        | <i>Semprex</i>  | Acrivastine                       | 51 | 44   |
| Albuterol                        | Albuterol           | Atenolol        | Atenolol                          | 50 | 196  |
| Allopurinol                      | Allopurinol         | Atenolol        | Atenolol                          | 50 | 6    |
| Trihexyphenidyl                  | <i>Artane</i>       | <i>Altace</i>   | Ramipril                          | 50 | 0    |
| Danazol                          | Danazol             | Dapsone         | Dapsone                           | 50 | 0    |
| Torsemide                        | <i>Demadex</i>      | <i>Demerol</i>  | Meperidine                        | 50 | 1    |
| Triazolam                        | <i>Halcion</i>      | <i>Haldol</i>   | Haloperidol                       | 50 | 0    |
| Esomeprazole                     | <i>Nexium</i>       | <i>Nexavar</i>  | Sorafenib                         | 50 | 0    |
| Pyridoxine                       | Pyridoxine          | Pyridostigmine  | Pyridostigmine                    | 50 | 0    |
| Sertraline                       | Sertraline          | Spiroinolactone | Spiroinolactone                   | 50 | 10   |
| Trazodone                        | Trazodone           | <i>Tapazole</i> | Methimazole                       | 50 | 6    |
| Chlorpropamide                   | Chlorpropamide      | Chlorpromazine  | Chlorpromazine                    | 49 | 0    |
| Cortisone                        | <i>Cortone</i>      | <i>Coreg</i>    | Carvediolol                       | 49 | 0    |
| Losartan                         | Losartan            | Lovastatin      | Lovastatin                        | 49 | 1    |
| Mesalamine                       | Mesalamine          | Memantine       | Memantine                         | 49 | 0    |
| Metaxalone                       | Metaxalone          | Methimazole     | Methimazole                       | 49 | 6    |
| Phytonadione                     | Phytonadione        | <i>Coumadin</i> | Warfarin                          | 49 | 5    |
| Potassium Chloride               | Potassium Chloride  | Sodium Chloride | Sodium Chloride                   | 49 | 57   |
| Hydrocodone + Acetaminophen      | <i>Vicodin</i>      | <i>Vytorin</i>  | Ezetimibe + Simvastatin           | 49 | 20   |
| Zolmitriptan                     | <i>Zomig</i>        | <i>Zonegran</i> | Zonisamide                        | 49 | 3    |
| Benzonatate                      | Benzonatate         | Benzotropine    | Benzotropine                      | 48 | 19   |
| Clonazepam                       | Clonazepam          | Lorazepam       | Lorazepam                         | 48 | 486  |
| Losartan                         | <i>Cozaar</i>       | <i>Corgard</i>  | Nadolol                           | 48 | 0    |
| Diazepam                         | Diazepam            | Temazepam       | Temazepam                         | 48 | 62   |
| Diazepam                         | Diazepam            | Alprazolam      | Alprazolam                        | 48 | 201  |
| Piroxicam                        | <i>Feldene</i>      | Felodipine      | Felodipine                        | 48 | 0    |
| Carbidopa + Levodopa             | <i>Sinemet</i>      | <i>Janumet</i>  | Sitagliptin + Metformin           | 48 | 0    |
| Hydroxyzine                      | <i>Vistaril</i>     | <i>Versed</i>   | Midazolam                         | 48 | 42   |
| Hydrochlorothiazide + Bisoprolol | <i>Ziac</i>         | <i>Zebeta</i>   | Bisoprolol                        | 48 | 128  |
| Azithromycin                     | <i>Zithromax</i>    | <i>Zinacef</i>  | Cefuroxime                        | 48 | 9099 |
| Spiroinolactone                  | <i>Aldactone</i>    | Trazodone       | Trazodone                         | 47 | 4    |
| Alprazolam                       | Alprazolam          | <i>Ativan</i>   | Lorazepam                         | 47 | 255  |
| Ramipril                         | <i>Altace</i>       | <i>Atacand</i>  | Candesartan                       | 47 | 1    |
| Hydrochlorothiazide              | Hydrochlorothiazide | <i>Maxzide</i>  | Hydrochlorothiazide + Triamterene | 47 | 0    |
| Isotretinoin                     | Isotretinoin        | Isosorbide      | Isosorbide                        | 47 | 0    |
| Atorvastatin                     | <i>Lipitor</i>      | <i>Lortab</i>   | Hydrocodone +                     | 47 | 189  |

|                       |                     |                     |                                  |    |     |
|-----------------------|---------------------|---------------------|----------------------------------|----|-----|
|                       |                     |                     | Acetaminophen                    |    |     |
| Pantoprazole          | Pantoprazole        | Propranolol         | Propranolol                      | 47 | 21  |
| Midodrine             | <i>Proamatine</i>   | <i>Loniten</i>      | Minoxidil                        | 47 | 0   |
| Ramipril              | Ramipril            | Trihexyphenidyl     | Trihexyphenidyl                  | 47 | 0   |
| Lisinopril            | <i>Zestril</i>      | <i>Isordil</i>      | Isosorbide                       | 47 | 1   |
| Terbutaline           | <i>Brethine</i>     | Thiethylperazine    | Thiethylperazine                 | 46 | 0   |
| Doxazosin             | <i>Cardura</i>      | <i>Coumadin</i>     | Warfarin                         | 46 | 5   |
| Chlorpromazine        | Chlorpromazine      | Cyclobenzaprine     | Cyclobenzaprine                  | 46 | 5   |
| Diazepam              | Diazepam            | <i>Diabeta</i>      | Glyburide                        | 46 | 4   |
| Vitamin B Combination | <i>Foltx</i>        | <i>Folex</i>        | Methotrexate                     | 46 | 1   |
| Mesalamine            | Mesalamine          | Metaxalone          | Metaxalone                       | 46 | 6   |
| Mirtazapine           | Mirtazapine         | Metoprolol          | Metoprolol                       | 46 | 29  |
| Potassium Phosphate   | Potassium Phosphate | Sodium Phosphate    | Sodium Phosphate                 | 46 | 0   |
| Ropinirole            | <i>Requip</i>       | <i>Risperdal</i>    | Risperidone                      | 46 | 16  |
| Triazolam             | Triazolam           | Temazepam           | Temazepam                        | 46 | 1   |
| Rosiglitazone         | <i>Avandia</i>      | <i>Evista</i>       | Raloxifene                       | 45 | 0   |
| Cefuroxime            | <i>Ceftin</i>       | <i>Cipro</i>        | Ciprofloxacin                    | 45 | 275 |
| Medroxyprogesterone   | Medroxyprogesterone | Methylprednisolone  | Methylprednisolone               | 45 | 191 |
| Phenazopyridine       | Phenazopyridine     | Phenoxybenzamine    | Phenoxybenzamine                 | 45 | 0   |
| Amiloride             | Amiloride           | Amlodipine          | Amlodipine                       | 44 | 8   |
| Donepezil             | <i>Aricept</i>      | <i>Azilect</i>      | Rasagiline                       | 44 | 0   |
| Bethanechol           | Bethanechol         | Baclofen            | Baclofen                         | 44 | 9   |
| Memantine             | Memantine           | Methimazole         | Methimazole                      | 44 | 0   |
| Methylphenidate       | Methylphenidate     | Methadone           | Methadone                        | 44 | 9   |
| Bromocriptine         | <i>Parlodel</i>     | Pindolol            | Pindolol                         | 44 | 0   |
| Amantadine            | Amantadine          | Amiodarone          | Amiodarone                       | 43 | 0   |
| Hydroxyzine           | <i>Atarax</i>       | <i>Xanax</i>        | Alprazolam                       | 43 | 430 |
| Losartan              | <i>Cozaar</i>       | <i>Coreg</i>        | Carvedilol                       | 43 | 7   |
| Hydrocortisone        | Hydrocortisone      | Hydrochlorothiazide | Hydrochlorothiazide              | 43 | 80  |
| Chlordiazepoxide      | <i>Librium</i>      | <i>Limbitrol</i>    | Chlordiazepoxide + Amitriptyline | 43 | 2   |
| Trazodone             | Trazodone           | Triazolam           | Triazolam                        | 43 | 4   |
| Trimethoprim          | Trimethoprim        | Trimethobenzamide   | Trimethobenzamide                | 43 | 0   |
| Amantadine            | Amantadine          | <i>Flumadine</i>    | Rimantidine                      | 42 | 9   |
| Diphenhydramine       | Diphenhydramine     | Dicyclomine         | Dicyclomine                      | 42 | 114 |
| Benazepril            | <i>Lotensin</i>     | <i>Lanoxin</i>      | Digoxin                          | 42 | 18  |
| Magnesium Sulfate     | Magnesium Sulfate   | Morphine            | Morphine                         | 42 | 0   |
| Omeprazole            | Omeprazole          | Aripiprazole        | Aripiprazole                     | 42 | 61  |
| Acitretin             | <i>Soriatane</i>    | <i>Loxitane</i>     | Loxapine                         | 42 | 0   |
| Itraconazole          | <i>Sporanox</i>     | <i>Topamax</i>      | Topiramate                       | 42 | 6   |
| Cetirizine            | <i>Zyrtec</i>       | <i>Zerit</i>        | Stavudine                        | 42 | 23  |
| Timolol               | <i>Blocadren</i>    | Baclofen            | Baclofen                         | 41 | 0   |

|                                       |                      |                     |                             |    |      |
|---------------------------------------|----------------------|---------------------|-----------------------------|----|------|
| Indapamide                            | Indapamide           | Indomethacin        | Indomethacin                | 41 | 1    |
| Pyridoxine                            | Pyridoxine           | <i>Pyridium</i>     | Phenazopyridine             | 41 | 0    |
| Ropinirole                            | Ropinirole           | Reserpine           | Reserpine                   | 41 | 0    |
| Diphenhydramine                       | <i>Benadryl</i>      | <i>Benicar</i>      | Olmesartan                  | 40 | 3    |
| Donepezil                             | Donepezil            | Rabeprazole         | Rabeprazole                 | 40 | 0    |
| Vitamin B and C Combination           | <i>Renal Caps</i>    | <i>Renagel</i>      | Sevelamer                   | 40 | 1    |
| Bupropion                             | Bupropion            | Buspirone           | Buspirone                   | 39 | 179  |
| Meperidine                            | Meperidine           | Morphine            | Morphine                    | 39 | 22   |
| Repaglinide                           | Repaglinide          | Ropinirole          | Ropinirole                  | 39 | 0    |
| Zaleplon                              | <i>Sonata</i>        | <i>Soriatane</i>    | Acitretin                   | 39 | 0    |
| Sitagliptin                           | <i>Januvia</i>       | <i>Jantoven</i>     | Warfarin                    | 38 | 1    |
| Dexlansoprazole                       | <i>Kapidex</i>       | <i>Kadian</i>       | Morphine                    | 38 | 0    |
| Prenatal Multivitamin                 | <i>Materna</i>       | <i>Matulane</i>     | Procarbazine                | 38 | 0    |
| Hydrochlorothiazide + Triamterene     | <i>Maxzide</i>       | <i>Minizide</i>     | Polythiazide + Prazosin     | 38 | 0    |
| Methylphenidate                       | <i>Methylin</i>      | Methadone           | Methadone                   | 38 | 9    |
| Pancrelipase                          | <i>Pancrease</i>     | <i>Pentasa</i>      | Mesalamine                  | 38 | 5    |
| Temazepam                             | Temazepam            | Mirtazapine         | Mirtazapine                 | 38 | 78   |
| Tamsulosin                            | <i>Flomax</i>        | <i>Nolvadex</i>     | Tamoxifen                   | 37 | 0    |
| Tamsulosin                            | <i>Flomax</i>        | <i>Flovent</i>      | Fluticasone                 | 37 | 7    |
| Gemfibrozil                           | Gemfibrozil          | Gabapentin          | Gabapentin                  | 37 | 0    |
| Omeprazole                            | <i>Prilosec</i>      | Prednisone          | Prednisone                  | 37 | 719  |
| Trazodone                             | Trazodone            | <i>Deltasone</i>    | Prednisone                  | 37 | 12   |
| Chlorthalidone                        | Chlorthalidone       | Chlorpromazine      | Chlorpromazine              | 36 | 0    |
| Lovastatin                            | Lovastatin           | <i>Lotensin</i>     | Benazepril                  | 36 | 0    |
| Metronidazole                         | Metronidazole        | Potassium Chloride  | Potassium Chloride          | 36 | 148  |
| Mifepristone                          | <i>Mifeprex</i>      | <i>Mirapex</i>      | Pramipexole                 | 36 | 0    |
| Famotidine                            | <i>Pepcid</i>        | <i>Prinivil</i>     | Lisinopril                  | 36 | 50   |
| Cetirizine                            | Cetirizine           | Cyclobenzaprine     | Cyclobenzaprine             | 35 | 2379 |
| Meperidine                            | Meperidine           | Methadone           | Methadone                   | 35 | 4    |
| Nabumetone                            | <i>Relafen</i>       | <i>Robaxin</i>      | Methocarbamol               | 35 | 48   |
| Sodium Phosphate                      | Sodium Phosphate     | Potassium Phosphate | Potassium Phosphate         | 35 | 0    |
| Tretinoin                             | Tretinoin            | Isotretinoin        | Isotretinoin                | 35 | 0    |
| Trimethoprim                          | Trimethoprim         | Triamterene         | Triamterene                 | 35 | 1    |
| Sodium Biphosphate + Sodium Phosphate | <i>Visicol</i>       | <i>Asacol</i>       | Mesalamine                  | 35 | 6    |
| Caffeine                              | <i>Vivarin</i>       | <i>Viravan</i>      | Phenylephrine + Ppyrilamine | 35 | 0    |
| Azithromycin                          | Azithromycin         | <i>Zaroxolyn</i>    | Metolazone                  | 34 | 19   |
| Iron                                  | <i>Ferro Sequels</i> | <i>Seroquel</i>     | Quetiapine                  | 34 | 70   |
| Hydrochlorothiazide                   | Hydrochlorothiazide  | Hydroxyurea         | Hydroxyurea                 | 34 | 0    |

|                             |                  |                             |                                                                |    |      |
|-----------------------------|------------------|-----------------------------|----------------------------------------------------------------|----|------|
| Hydrocodone                 | Hydrocodone      | Hydrocortisone              | Hydrocortisone                                                 | 34 | 1490 |
| Sitagliptin + Metformin     | <i>Janumet</i>   | <i>Januvia</i>              | Sitagliptin                                                    | 34 | 0    |
| Sumatriptan                 | Sumatriptan      | Sitagliptin                 | Sitagliptin                                                    | 34 | 1    |
| Ipratropium                 | <i>Atrovent</i>  | <i>Flovent</i>              | Fluticasone                                                    | 33 | 1214 |
| Cetirizine                  | Cetirizine       | Clonidine                   | Clonidine                                                      | 33 | 4222 |
| Dexlansoprazole             | <i>Kapidex</i>   | <i>Casodex</i>              | Bicalutamide                                                   | 33 | 0    |
| Rabeprazole                 | Rabeprazole      | Raloxifene                  | Raloxifene                                                     | 33 | 0    |
| Terazosin                   | Terazosin        | Terbutaline                 | Terbutaline                                                    | 33 | 0    |
| Flavoxate                   | <i>Urispas</i>   | <i>Urised</i>               | Hyoscyamine + Methenamine + Methylene Blue + Phenyl salicylate | 33 | 4    |
| Lisinopril                  | <i>Zestril</i>   | <i>Zegerid</i>              | Omeprazole + Sodium Bicarbonate                                | 33 | 15   |
| Flavoxate                   | Flavoxate        | Fluvoxamine                 | Fluvoxamine                                                    | 32 | 0    |
| Sitagliptin + Metformin     | <i>Janumet</i>   | <i>Jantoven</i>             | Warfarin                                                       | 32 | 0    |
| Metoclopramide              | <i>Reglan</i>    | <i>Regonol</i>              | Pyridostigmine                                                 | 32 | 4    |
| Loperamide                  | Loperamide       | Furosemide                  | Furosemide                                                     | 31 | 9    |
| Nitrofurantoin              | <i>Macrobid</i>  | <i>Nitro Bid</i>            | Nitroglycerin                                                  | 31 | 5    |
| Methocarbamol               | Methocarbamol    | Metformin                   | Metformin                                                      | 31 | 17   |
| Meloxicam                   | <i>Mobic</i>     | <i>Moban</i>                | Molindone                                                      | 31 | 0    |
| Valacyclovir                | Valacyclovir     | Vancomycin                  | Vancomycin                                                     | 31 | 1    |
| Ezetimibe + Simvastatin     | <i>Vytorin</i>   | <i>Vicodin</i>              | Hydrocodone + Acetaminophen                                    | 31 | 20   |
| Cetirizine                  | <i>Zyrtec</i>    | <i>Ziac</i>                 | Hydrochlorothiazide + Bisoprolol                               | 31 | 16   |
| Gemfibrozil                 | <i>Lopid</i>     | <i>Lipitor</i>              | Atorvastatin                                                   | 30 | 4    |
| Hydrocodone + Acetaminophen | <i>Lortab</i>    | <i>Lomotil</i>              | Diphenoxylate + Atropine                                       | 30 | 1326 |
| Metronidazole               | Metronidazole    | Fluconazole                 | Fluconazole                                                    | 30 | 7133 |
| Nicotine                    | Nicotine         | Nitroglycerin               | Nitroglycerin                                                  | 30 | 0    |
| Nystatin                    | Nystatin         | Hmg Coa Reductase inhibitor | Hmg Coa Reductase inhibitor                                    | 30 | 62   |
| Ezetimibe                   | <i>Zetia</i>     | <i>Zebeta</i>               | Bisoprolol                                                     | 30 | 0    |
| Rosiglitazone + Metformin   | <i>Avandamet</i> | <i>Avandia</i>              | Rosiglitazone                                                  | 29 | 18   |
| Tolterodine                 | <i>Detrol</i>    | <i>Glucotrol</i>            | Glipizide                                                      | 29 | 1    |
| Guaifenesin                 | Guaifenesin      | Guanfacine                  | Guanfacine                                                     | 29 | 122  |
| Nystatin                    | Nystatin         | Phenytoin Sodium            | Phenytoin Sodium                                               | 29 | 72   |
| Medroxyprogesterone         | <i>Provera</i>   | <i>Procardia</i>            | Nifedipine                                                     | 29 | 43   |
| Hydrocodone + Acetaminophen | <i>Lortab</i>    | <i>Lipitor</i>              | Atorvastatin                                                   | 28 | 189  |
| Guanfacine                  | <i>Tenex</i>     | <i>Xanax</i>                | Alprazolam                                                     | 28 | 45   |
| Zolpidem                    | <i>Ambien</i>    | <i>Ativan</i>               | Lorazepam                                                      | 27 | 342  |

|                             |                   |                   |                                   |    |      |
|-----------------------------|-------------------|-------------------|-----------------------------------|----|------|
| Hydrocodone + Acetaminophen | <i>Hydrogesic</i> | Hydroxyzine       | Hydroxyzine                       | 27 | 85   |
| Ketorolac                   | Ketorolac         | <i>Kerlone</i>    | Betaxolol                         | 27 | 0    |
| Dronabinol                  | <i>Marinol</i>    | <i>Maxzide</i>    | Hydrochlorothiazide + Triamterene | 27 | 0    |
| Lansoprazole                | <i>Prevacid</i>   | Prednisone        | Prednisone                        | 27 | 2146 |
| Carisoprodol                | Carisoprodol      | Carbamazepine     | Carbamazepine                     | 26 | 17   |
| Nystatin                    | Nystatin          | <i>Dilantin</i>   | Phenytoin                         | 26 | 101  |
| Oxycodone                   | <i>Oxycontin</i>  | Oxybutynin        | Oxybutynin                        | 26 | 149  |
| Metoclopramide              | <i>Reglan</i>     | <i>Requip</i>     | Ropinirole                        | 26 | 5    |
| Zolpidem                    | <i>Ambien</i>     | <i>Abilify</i>    | Aripiprazole                      | 25 | 165  |
| Sucralfate                  | <i>Carafate</i>   | <i>Kayexalate</i> | Sodium Polystyrene Sulfonate      | 25 | 0    |
| Hyoscyamine                 | <i>Levsin</i>     | <i>Lanoxin</i>    | Digoxin                           | 25 | 24   |
| Fosfomycin                  | <i>Monurol</i>    | <i>Monopril</i>   | Fosinopril                        | 25 | 0    |
| Sumatriptan                 | <i>Imitrex</i>    | Imipramine        | Imipramine                        | 24 | 50   |
| Hydrocodone + Acetaminophen | <i>Lortab</i>     | <i>Lotrel</i>     | Amlodipine + Benazepril           | 24 | 86   |
| Methylphenidate             | <i>Metadate</i>   | Methadone         | Methadone                         | 24 | 9    |
| Finasteride                 | <i>Proscar</i>    | <i>Prosom</i>     | Estazolam                         | 24 | 0    |
| Cetirizine                  | <i>Zyrtec</i>     | <i>Norvasc</i>    | Amlodipine                        | 24 | 233  |
| Diclofenac                  | <i>Voltaren</i>   | <i>Ultram</i>     | Tramadol                          | 23 | 747  |
| Docusate                    | <i>Colace</i>     | <i>Calan</i>      | Verapamil                         | 22 | 0    |
| Thiamine                    | Thiamine          | <i>Thorazine</i>  | Chlorpromazine                    | 22 | 0    |
| Ketorolac                   | <i>Toradol</i>    | <i>Stadol</i>     | Butorphanol                       | 21 | 1    |
| Pilocarpine                 | <i>Salagen</i>    | Selegiline        | Selegiline                        | 20 | 0    |
| Orlistat                    | <i>Xenical</i>    | <i>Xeloda</i>     | Capecitabine                      | 20 | 0    |
| Diphenhydramine             | Diphenhydramine   | Dipyridamole      | Dipyridamole                      | 19 | 1    |
| Hydroxyzine                 | Hydroxyzine       | <i>Hydrogesic</i> | Hydrocodone + Acetaminophen       | 19 | 85   |
| Atorvastatin                | <i>Lipitor</i>    | <i>Loniten</i>    | Minoxidil                         | 19 | 3    |
| Phenazopyridine             | Phenazopyridine   | Promethazine      | Promethazine                      | 19 | 3344 |
| Pseudoephedrine             | <i>Sudafed</i>    | Sotalol           | Sotalol                           | 19 | 1    |
| Bupropion                   | <i>Zyban</i>      | <i>Diovan</i>     | Valsartan                         | 19 | 6    |
| Iron                        | <i>Niferex</i>    | <i>Norflex</i>    | Orphenadrine                      | 18 | 3    |
| Vardenafil                  | <i>Levitra</i>    | <i>Lexiva</i>     | Fosamprenavir                     | 17 | 0    |
| Lansoprazole                | <i>Prevacid</i>   | <i>Procardia</i>  | Nifedipine                        | 17 | 34   |
| Paricalcitol                | <i>Zemlar</i>     | <i>Zelapar</i>    | Selegiline                        | 17 | 0    |
| Glutamine                   | Glutamine         | Galantamine       | Galantamine                       | 16 | 0    |
| Calcitriol                  | Calcitriol        | Calcium           | Calcium                           | 14 | 66   |
| Ibuprofen                   | <i>Profen</i>     | <i>Parafon</i>    | Chlorzoxazone                     | 14 | 346  |
| Cetirizine                  | <i>Zyrtec</i>     | <i>Zyprexa</i>    | Olanzapine                        | 14 | 547  |
| Loratadine                  | Loratadine        | Lorazepam         | Lorazepam                         | 12 | 523  |
| Cyproheptadine              | <i>Periactin</i>  | Perphenazine      | Perphenazine                      | 12 | 1    |
| Loratadine                  | Loratadine        | <i>Lortab</i>     | Hydrocodone + Acetaminophen       | 9  | 8259 |

|               |                       |               |               |   |   |
|---------------|-----------------------|---------------|---------------|---|---|
| Phenylephrine | <i>Neo-Synephrine</i> | Nitroglycerin | Nitroglycerin | 8 | 0 |
|---------------|-----------------------|---------------|---------------|---|---|

\* Intended Drug: The drug patient was supposed to receive.

† Delivered Drug: The drug patient received in error.

‡ Average Harm Score: Represents the average of Round 3 evaluations of the opinion-generated estimate of the harm that might occur from this substitution, where patient did not receive the intended drug.

§ Number of Subjects: Represents the number of subjects in the 2000-2009 data who received both drugs in the respective LASA pair within a six month period, regardless of whether this was intended or in error. Each occurrence represents a potential LASA substitution error.

**BOLD** typeface indicates that the LASA pair is in the highest decile for potential harm for receiving the delivered drug in error and the highest decile for potential harm of not receiving the intended drug.

*Italic* typeface indicates brand names.
